# Supplementary material for: Low-Affinity/High-Selectivity Dopamine Transport Inhibition Sufficient to Rescue Cognitive Functions in the Aging Rat
Source: MDPI journal article supplement (doi:10.3390/biom13030467), 2023-03-03
Supplement: s1 [file s1]

Supporting Information for:

# Low-affinity/high selectivity dopamine transport inhibition sufficient to rescue cognitive functions in the aging rat

**Jana Lubec**<sup>1,†,‡</sup>, **Ahmed M. Hussein**<sup>1,2,3,†</sup>, **Predrag Kalaba**<sup>2,†</sup>, **Daniel Daba Feyissa**<sup>2</sup>, **Edgar Arias-Sandoval**<sup>4</sup>, **Anita Cybulska-Klosowicz**<sup>5</sup>, **Mekite Bezu**<sup>2</sup>, **Tamara Stojanovic**<sup>1</sup>, **Volker Korz**<sup>1</sup>, **Jovana Malikovic**<sup>2</sup>, **Nilima Y. Aher**<sup>2</sup>, **Martin Zehl**<sup>6</sup>, **Vladimir Dragacevic**<sup>1,2</sup>, **Johann Jakob Leban**<sup>1</sup>, **Claudia Sgheddu**<sup>7</sup>, **Judith Wackerlig**<sup>2</sup>, **Marco Pistis**<sup>7,8</sup>, **Merce Correa**<sup>4,9</sup>, **Thierry Langer**<sup>2</sup>, **Ernst Urban**<sup>2</sup>, **Harald Höger**<sup>10</sup> and **Gert Lubec**<sup>1,\*</sup>

<sup>1</sup> Programme for Proteomics, Paracelsus Medical University, 5020 Salzburg, Austria; jana.aradska@gmail.com (J.L.); hamadaz81@gmail.com (A.M.H.); tamara.stojanovich@gmail.com (T.S.); volkerkorz@arcor.de (V.K.); dragacevicvladimir@gmail.com (V.D.); j-e-leban@outlook.com (J.J.L.)

<sup>2</sup> Department of Pharmaceutical Sciences, Division of Pharmaceutical Chemistry, Faculty of Life Sciences, University of Vienna, 1090 Vienna, Austria; peja87.bgd@gmail.com (P.K.); daniel.daba@ju.edu.et (D.D.F.); mekiteb@yahoo.com (M.B.); malikovicjovana@gmail.com (J.M.); ahernilima12@gmail.com (N.Y.A.); judith.wackerlig@univie.ac.at (J.W.); thierry.langer@univie.ac.at (T.L.); ernst.urban@univie.ac.at (E.U.)

<sup>3</sup> Department of Zoology, Faculty of Science, Al-Azhar University, 71524 Assiut, Egypt

<sup>4</sup> Department of Psychobiology, Universitat Jaume I, 12006 Castelló, Spain; ariasdes@uji.es (E.A.-S.); correa@uji.es (M.C.)

<sup>5</sup> Neurobiology of Emotions Laboratory, Nencki Institute of Experimental Biology, 02093 Warsaw, Poland; a.cybulska@nencki.edu.pl

<sup>6</sup> Department of Analytical Chemistry, Faculty of Chemistry, University of Vienna, 1090 Vienna, Austria; martin.zehl@univie.ac.at

<sup>7</sup> Department of Biomedical Sciences, Division of Neuroscience and Clinical Pharmacology, University of Cagliari, 09042 Monserrato, Italy; sghedduclaudia@gmail.com (C.S.); mpistis@unica.it (M.P.)

<sup>8</sup> Section of Cagliari, Neuroscience Institute, National Research Council of Italy (CNR), 09042 Cagliari, Italy

<sup>9</sup> Department of Psychological Sciences, Behavioral Neuroscience Division, University of Connecticut, 06269 Storrs, Connecticut, USA

<sup>10</sup> Core Unit of Biomedical Research, Division of Laboratory Animal Science and Genetics, Medical University of Vienna, 2325 Himberg, Austria; harald.hoeger@meduniwien.ac.at

### **Functional GPCRs agonist and antagonist screening**

This study was outsourced to Eurofins Cerep (Celle l'Evescault, France) and compliant with the corresponding project FR095-0004218.

**Table S1** Agonist effect of S-CE-123 at  $2.8 \times 10^{-6}$  M (IC<sub>50</sub> for DAT re-uptake inhibition) in functional cellular assay. The results are expressed as a percent of control agonist response: (measured response / control response) x 100 obtained in the presence of S-CE-123.

| Compound I.D.                               | Client Compound I.D. | Test Concentration | % of Control Agonist Response |                 |       |
|---------------------------------------------|----------------------|--------------------|-------------------------------|-----------------|-------|
|                                             |                      |                    | 1 <sup>st</sup>               | 2 <sup>nd</sup> | Mean  |
| <b>A1 (h) (agonist effect)</b>              |                      |                    |                               |                 |       |
| 100043705-1                                 | S-CE-123             | 2.8E-06 M          | 5.3                           | 0.8             | 3.0   |
| <b>A<sub>1A</sub> (agonist effect)</b>      |                      |                    |                               |                 |       |
| 100043705-1                                 | S-CE-123             | 2.8E-06 M          | -0.9                          | 1.2             | 0.2   |
| <b>A<sub>1B</sub> (h) (agonist effect)</b>  |                      |                    |                               |                 |       |
| 100043705-1                                 | S-CE-123             | 2.8E-06 M          | 0.5                           | 3.4             | 1.9   |
| <b>A<sub>2</sub> (h) (agonist effect)</b>   |                      |                    |                               |                 |       |
| 100043705-1                                 | S-CE-123             | 2.8E-06 M          | -7.5                          | -41.0           | -24.3 |
| <b>α<sub>1A</sub> (h) (agonist effect)</b>  |                      |                    |                               |                 |       |
| 100043705-1                                 | S-CE-123             | 2.8E-06 M          | -2.5                          | -2.4            | -2.5  |
| <b>α<sub>1B</sub> (h) (agonist effect)</b>  |                      |                    |                               |                 |       |
| 100043705-1                                 | S-CE-123             | 2.8E-06 M          | 7.2                           | -8.5            | -0.6  |
| <b>α<sub>1D</sub> (h) (agonist effect)</b>  |                      |                    |                               |                 |       |
| 100043705-1                                 | S-CE-123             | 2.8E-06 M          | 0.6                           | 0.6             | 0.6   |
| <b>α<sub>2A</sub> (h) (agonist effect)</b>  |                      |                    |                               |                 |       |
| 100043705-1                                 | S-CE-123             | 2.8E-06 M          | 2.3                           | 1.7             | 2.0   |
| <b>α<sub>2B</sub> (h) (agonist effect)</b>  |                      |                    |                               |                 |       |
| 100043705-1                                 | S-CE-123             | 2.8E-06 M          | -3.6                          | -4.9            | -4.2  |
| <b>α<sub>2C</sub> (h) (agonist effect)</b>  |                      |                    |                               |                 |       |
| 100043705-1                                 | S-CE-123             | 2.8E-06 M          | 4.0                           | 6.2             | 5.1   |
| <b>β<sub>1</sub> (h) (agonist effect)</b>   |                      |                    |                               |                 |       |
| 100043705-1                                 | S-CE-123             | 2.8E-06 M          | -0.1                          | -3.9            | -2.0  |
| <b>β<sub>2</sub> (h) (agonist effect)</b>   |                      |                    |                               |                 |       |
| 100043705-1                                 | S-CE-123             | 2.8E-06 M          | -2.1                          | 1.0             | -0.6  |
| <b>β<sub>3</sub> (h) (agonist effect)</b>   |                      |                    |                               |                 |       |
| 100043705-1                                 | S-CE-123             | 2.8E-06 M          | -3.2                          | 3.8             | 0.3   |
| <b>AT<sub>1</sub> (h) (agonist effect)</b>  |                      |                    |                               |                 |       |
| 100043705-1                                 | S-CE-123             | 2.8E-06 M          | -3.6                          | -1.2            | -2.4  |
| <b>APJ (apelin) (h) (agonist effect)</b>    |                      |                    |                               |                 |       |
| 100043705-1                                 | S-CE-123             | 2.8E-06 M          | 0.0                           | -13.1           | -6.5  |
| <b>TGR5 (h) (agonist effect)</b>            |                      |                    |                               |                 |       |
| 100043705-1                                 | S-CE-123             | 2.8E-06 M          | 3.3                           | 1.4             | 2.3   |
| <b>BB<sub>1</sub> (h) (agonist effect)</b>  |                      |                    |                               |                 |       |
| 100043705-1                                 | S-CE-123             | 2.8E-06 M          | -1.1                          | -3.7            | -2.4  |
| <b>BB<sub>2</sub> (h) (agonist effect)</b>  |                      |                    |                               |                 |       |
| 100043705-1                                 | S-CE-123             | 2.8E-06 M          | -0.3                          | 0.8             | 0.3   |
| <b>BB<sub>3</sub> (h) (agonist effect)</b>  |                      |                    |                               |                 |       |
| 100043705-1                                 | S-CE-123             | 2.8E-06 M          | -6.8                          | -5.9            | -6.3  |
| <b>B<sub>1</sub> (h) (agonist effect)</b>   |                      |                    |                               |                 |       |
| 100043705-1                                 | S-CE-123             | 2.8E-06 M          | -12.4                         | -11.5           | -11.9 |
| <b>B<sub>2</sub> (h) (agonist effect)</b>   |                      |                    |                               |                 |       |
| 100043705-1                                 | S-CE-123             | 2.8E-06 M          | -5.6                          | -1.0            | -3.3  |
| <b>CGRP (h) (agonist effect)</b>            |                      |                    |                               |                 |       |
| 100043705-1                                 | S-CE-123             | 2.8E-06 M          | 7.4                           | 7.2             | 7.3   |
| <b>CT (Calcitonin) (h) (agonist effect)</b> |                      |                    |                               |                 |       |
| 100043705-1                                 | S-CE-123             | 2.8E-06 M          | 3.4                           | 0.9             | 2.2   |
| <b>CaS (h) (agonist effect)</b>             |                      |                    |                               |                 |       |
| 100043705-1                                 | S-CE-123             | 2.8E-06 M          | 2.2                           | 1.9             | 2.0   |
| <b>CB<sub>1</sub> (h) (agonist effect)</b>  |                      |                    |                               |                 |       |
| 100043705-1                                 | S-CE-123             | 2.8E-06 M          | -1.3                          | 5.2             | 2.0   |
| <b>CB<sub>2</sub> (h) (agonist effect)</b>  |                      |                    |                               |                 |       |
| 100043705-1                                 | S-CE-123             | 2.8E-06 M          | -16.9                         | 25.9            | 4.5   |
| <b>CCR1 (h) (agonist effect)</b>            |                      |                    |                               |                 |       |
| 100043705-1                                 | S-CE-123             | 2.8E-06 M          | 8.1                           | 6.8             | 7.4   |
| <b>CCR2 (h) (agonist effect)</b>            |                      |                    |                               |                 |       |
| 100043705-1                                 | S-CE-123             | 2.8E-06 M          | 5.5                           | 2.7             | 4.1   |

| Compound I.D.                                                 | Client Compound I.D. | Test Concentration | 1 <sup>st</sup> | % of Control Agonist Response<br>2 <sup>nd</sup> | Mean |
|---------------------------------------------------------------|----------------------|--------------------|-----------------|--------------------------------------------------|------|
| <b>CCR3 (h) (agonist effect)</b>                              |                      |                    |                 |                                                  |      |
| 100043705-1                                                   | S-CE-123             | 2.8E-06 M          | 1.4             | 1.2                                              | 1.3  |
| <b>CCR4 (h) (agonist effect)</b>                              |                      |                    |                 |                                                  |      |
| 100043705-1                                                   | S-CE-123             | 2.8E-06 M          | -0.5            | -0.3                                             | -0.4 |
| <b>CCR5 (agonist effect)</b>                                  |                      |                    |                 |                                                  |      |
| 100043705-1                                                   | S-CE-123             | 2.8E-06 M          | -0.8            | -0.2                                             | -0.5 |
| <b>CCR6 (h) (agonist effect)</b>                              |                      |                    |                 |                                                  |      |
| 100043705-1                                                   | S-CE-123             | 2.8E-06 M          | -1.8            | -2.1                                             | -1.9 |
| <b>CCR7 (h) (agonist effect)</b>                              |                      |                    |                 |                                                  |      |
| 100043705-1                                                   | S-CE-123             | 2.8E-06 M          | 1.2             | 0.2                                              | 0.7  |
| <b>CCR8 (h) (agonist effect)</b>                              |                      |                    |                 |                                                  |      |
| 100043705-1                                                   | S-CE-123             | 2.8E-06 M          | 3.1             | 3.8                                              | 3.4  |
| <b>CCR10 (h) (agonist effect)</b>                             |                      |                    |                 |                                                  |      |
| 100043705-1                                                   | S-CE-123             | 2.8E-06 M          | 0.0             | 0.3                                              | 0.2  |
| <b>CX3CR1 (h) (agonist effect)</b>                            |                      |                    |                 |                                                  |      |
| 100043705-1                                                   | S-CE-123             | 2.8E-06 M          | 3.2             | 1.7                                              | 2.4  |
| <b>CXCR1 (h) (agonist effect)</b>                             |                      |                    |                 |                                                  |      |
| 100043705-1                                                   | S-CE-123             | 2.8E-06 M          | 0.0             | 0.3                                              | 0.1  |
| <b>CXCR2 (h) (agonist effect)</b>                             |                      |                    |                 |                                                  |      |
| 100043705-1                                                   | S-CE-123             | 2.8E-06 M          | 1.9             | -2.9                                             | -0.5 |
| <b>CXCR3 (h) (agonist effect)</b>                             |                      |                    |                 |                                                  |      |
| 100043705-1                                                   | S-CE-123             | 2.8E-06 M          | 1.1             | -0.4                                             | 0.4  |
| <b>CXCR4 (h) (agonist effect)</b>                             |                      |                    |                 |                                                  |      |
| 100043705-1                                                   | S-CE-123             | 2.8E-06 M          | -0.3            | -0.2                                             | -0.2 |
| <b>CXCR5 (h) (agonist effect)</b>                             |                      |                    |                 |                                                  |      |
| 100043705-1                                                   | S-CE-123             | 2.8E-06 M          | 1.0             | 0.9                                              | 0.9  |
| <b>CXCR6 (h) (agonist effect)</b>                             |                      |                    |                 |                                                  |      |
| 100043705-1                                                   | S-CE-123             | 2.8E-06 M          | -0.4            | -1.2                                             | -0.8 |
| <b>CCK<sub>1</sub> (CCK<sub>6</sub>) (h) (agonist effect)</b> |                      |                    |                 |                                                  |      |
| 100043705-1                                                   | S-CE-123             | 2.8E-06 M          | 0.4             | 0.6                                              | 0.5  |
| <b>CCK<sub>2</sub> (CCK<sub>6</sub>) (h) (agonist effect)</b> |                      |                    |                 |                                                  |      |
| 100043705-1                                                   | S-CE-123             | 2.8E-06 M          | -2.2            | 0.2                                              | -1.0 |
| <b>C3aR (h) (agonist effect)</b>                              |                      |                    |                 |                                                  |      |
| 100043705-1                                                   | S-CE-123             | 2.8E-06 M          | -0.5            | -0.1                                             | -0.3 |
| <b>ChemR23 (h) (agonist effect)</b>                           |                      |                    |                 |                                                  |      |
| 100043705-1                                                   | S-CE-123             | 2.8E-06 M          | 0.0             | 1.4                                              | 0.7  |
| <b>CRF<sub>1</sub> (h) (agonist effect)</b>                   |                      |                    |                 |                                                  |      |
| 100043705-1                                                   | S-CE-123             | 2.8E-06 M          | -1.2            | -3.7                                             | -2.5 |
| <b>CRF<sub>2</sub> (h) (agonist effect)</b>                   |                      |                    |                 |                                                  |      |
| 100043705-1                                                   | S-CE-123             | 2.8E-06 M          | -1.4            | -2.2                                             | -1.8 |
| <b>XCR1 / GPR5 (h) (agonist effect)</b>                       |                      |                    |                 |                                                  |      |
| 100043705-1                                                   | S-CE-123             | 2.8E-06 M          | 2.3             | 0.4                                              | 1.3  |
| <b>D<sub>1</sub> (h) (agonist effect)</b>                     |                      |                    |                 |                                                  |      |
| 100043705-1                                                   | S-CE-123             | 2.8E-06 M          | 0.2             | -0.5                                             | -0.1 |
| <b>D<sub>2S</sub> (h) (agonist effect)</b>                    |                      |                    |                 |                                                  |      |
| 100043705-1                                                   | S-CE-123             | 2.8E-06 M          | 9.2             | 11.7                                             | 10.5 |
| <b>D<sub>3</sub> (h) (agonist effect)</b>                     |                      |                    |                 |                                                  |      |
| 100043705-1                                                   | S-CE-123             | 2.8E-06 M          | -20.1           | 5.7                                              | -7.2 |
| <b>D<sub>4L</sub> (h) (agonist effect)</b>                    |                      |                    |                 |                                                  |      |
| 100043705-1                                                   | S-CE-123             | 2.8E-06 M          | -10.2           | -1.6                                             | -5.9 |
| <b>D<sub>5</sub> (h) (agonist effect)</b>                     |                      |                    |                 |                                                  |      |
| 100043705-1                                                   | S-CE-123             | 2.8E-06 M          | -2.0            | 0.6                                              | -0.7 |
| <b>ET<sub>A</sub> (h) (agonist effect)</b>                    |                      |                    |                 |                                                  |      |
| 100043705-1                                                   | S-CE-123             | 2.8E-06 M          | 1.0             | 1.4                                              | 1.2  |
| <b>ET<sub>B</sub> (h) (agonist effect)</b>                    |                      |                    |                 |                                                  |      |
| 100043705-1                                                   | S-CE-123             | 2.8E-06 M          | -0.5            | 2.7                                              | 1.1  |

| Compound I.D.                                                   | Client Compound I.D. | Test Concentration | 1 <sup>st</sup> | % of Control Agonist Response<br>2 <sup>nd</sup> | Mean  |
|-----------------------------------------------------------------|----------------------|--------------------|-----------------|--------------------------------------------------|-------|
| <b>FFA1 (h) (GPR40) (agonist effect)</b>                        |                      |                    |                 |                                                  |       |
| 100043705-1                                                     | S-CE-123             | 2.8E-06 M          | -2.6            | -2.7                                             | -2.7  |
| <b>FFA2 (h) (GPR43) (agonist effect)</b>                        |                      |                    |                 |                                                  |       |
| 100043705-1                                                     | S-CE-123             | 2.8E-06 M          | 6.4             | 6.7                                              | 6.6   |
| <b>FFA3 (h) (GPR41) (agonist effect)</b>                        |                      |                    |                 |                                                  |       |
| 100043705-1                                                     | S-CE-123             | 2.8E-06 M          | -19.5           | 11.7                                             | -3.9  |
| <b>FFA4 (GPR120) (h) (agonist effect)</b>                       |                      |                    |                 |                                                  |       |
| 100043705-1                                                     | S-CE-123             | 2.8E-06 M          | 0.3             | -0.5                                             | -0.1  |
| <b>GnRH (h) (agonist effect)</b>                                |                      |                    |                 |                                                  |       |
| 100043705-1                                                     | S-CE-123             | 2.8E-06 M          | -0.6            | -0.7                                             | -0.6  |
| <b>GPR39 (h) (agonist effect)</b>                               |                      |                    |                 |                                                  |       |
| 100043705-1                                                     | S-CE-123             | 2.8E-06 M          | -0.8            | 1.9                                              | 0.6   |
| <b>OXGR1 GPR99 (h) (agonist effect)</b>                         |                      |                    |                 |                                                  |       |
| 100043705-1                                                     | S-CE-123             | 2.8E-06 M          | 1.1             | 0.6                                              | 0.9   |
| <b>GPR103/QRFP (h) (agonist effect)</b>                         |                      |                    |                 |                                                  |       |
| 100043705-1                                                     | S-CE-123             | 2.8E-06 M          | 0.5             | -0.3                                             | 0.1   |
| <b>GPR109A (h) (agonist effect)</b>                             |                      |                    |                 |                                                  |       |
| 100043705-1                                                     | S-CE-123             | 2.8E-06 M          | 0.5             | 0.4                                              | 0.4   |
| <b>GPR119 (agonist effect)</b>                                  |                      |                    |                 |                                                  |       |
| 100043705-1                                                     | S-CE-123             | 2.8E-06 M          | 11.5            | -9.6                                             | 0.9   |
| <b>FPR1 (h) (agonist effect)</b>                                |                      |                    |                 |                                                  |       |
| 100043705-1                                                     | S-CE-123             | 2.8E-06 M          | -46.5           | -6.4                                             | -26.5 |
| <b>GABAB1b beta (h) (agonist effect)</b>                        |                      |                    |                 |                                                  |       |
| 100043705-1                                                     | S-CE-123             | 2.8E-06 M          | -0.3            | 0.2                                              | 0.0   |
| <b>GAL1 (h) (agonist effect)</b>                                |                      |                    |                 |                                                  |       |
| 100043705-1                                                     | S-CE-123             | 2.8E-06 M          | -0.8            | -1.7                                             | -1.3  |
| <b>GAL<sub>2</sub> (h) (agonist effect)</b>                     |                      |                    |                 |                                                  |       |
| 100043705-1                                                     | S-CE-123             | 2.8E-06 M          | 5.2             | 3.4                                              | 4.3   |
| <b>GIP (h) (agonist effect)</b>                                 |                      |                    |                 |                                                  |       |
| 100043705-1                                                     | S-CE-123             | 2.8E-06 M          | -0.1            | 0.3                                              | 0.1   |
| <b>GLP-1 (agonist effect)</b>                                   |                      |                    |                 |                                                  |       |
| 100043705-1                                                     | S-CE-123             | 2.8E-06 M          | 10.7            | 13.4                                             | 12.0  |
| <b>secretin (h) (agonist effect)</b>                            |                      |                    |                 |                                                  |       |
| 100043705-1                                                     | S-CE-123             | 2.8E-06 M          | -1.1            | 2.7                                              | 0.8   |
| <b>TSH (h) (agonist effect)</b>                                 |                      |                    |                 |                                                  |       |
| 100043705-1                                                     | S-CE-123             | 2.8E-06 M          | -4.3            | -3.6                                             | -3.9  |
| <b>GHRH (h) (agonist effect)</b>                                |                      |                    |                 |                                                  |       |
| 100043705-1                                                     | S-CE-123             | 2.8E-06 M          | 0.2             | 2.4                                              | 1.3   |
| <b>Ghrelin / GHSR-1a (h) (agonist effect)</b>                   |                      |                    |                 |                                                  |       |
| 100043705-1                                                     | S-CE-123             | 2.8E-06 M          | 1.7             | 2.6                                              | 2.2   |
| <b>H<sub>1</sub> (h) (agonist effect)</b>                       |                      |                    |                 |                                                  |       |
| 100043705-1                                                     | S-CE-123             | 2.8E-06 M          | -1.7            | -0.7                                             | -1.2  |
| <b>H<sub>2</sub> (h) (agonist effect)</b>                       |                      |                    |                 |                                                  |       |
| 100043705-1                                                     | S-CE-123             | 2.8E-06 M          | -4.4            | -0.6                                             | -2.5  |
| <b>H<sub>3</sub> (h) (agonist effect)</b>                       |                      |                    |                 |                                                  |       |
| 100043705-1                                                     | S-CE-123             | 2.8E-06 M          | -2.6            | 1.0                                              | -0.8  |
| <b>H<sub>4</sub> (h) (agonist effect)</b>                       |                      |                    |                 |                                                  |       |
| 100043705-1                                                     | S-CE-123             | 2.8E-06 M          | -0.2            | 1.7                                              | 0.7   |
| <b>KISS1 / GPR54 (h) (agonist effect)</b>                       |                      |                    |                 |                                                  |       |
| 100043705-1                                                     | S-CE-123             | 2.8E-06 M          | -0.3            | -0.7                                             | -0.5  |
| <b>BLT<sub>1</sub> (LTB<sub>4</sub>) (h) (agonist effect)</b>   |                      |                    |                 |                                                  |       |
| 100043705-1                                                     | S-CE-123             | 2.8E-06 M          | -0.6            | -1.4                                             | -1.0  |
| <b>CysLT<sub>1</sub> (LTD<sub>4</sub>) (h) (agonist effect)</b> |                      |                    |                 |                                                  |       |
| 100043705-1                                                     | S-CE-123             | 2.8E-06 M          | -9.7            | -6.8                                             | -8.2  |
| <b>CysLT<sub>2</sub> (LTC<sub>4</sub>) (h) (agonist effect)</b> |                      |                    |                 |                                                  |       |
| 100043705-1                                                     | S-CE-123             | 2.8E-06 M          | -0.5            | -1.9                                             | -1.2  |

| Compound I.D.                                                | Client Compound I.D. | Test Concentration | 1 <sup>st</sup> | % of Control Agonist Response<br>2 <sup>nd</sup> | Mean  |
|--------------------------------------------------------------|----------------------|--------------------|-----------------|--------------------------------------------------|-------|
| <b>LPA1(h) (agonist effect)</b>                              |                      |                    |                 |                                                  |       |
| 100043705-1                                                  | S-CE-123             | 2.8E-06 M          | -0.1            | -0.2                                             | -0.2  |
| <b>LPA<sub>2</sub> (h) (agonist effect)</b>                  |                      |                    |                 |                                                  |       |
| 100043705-1                                                  | S-CE-123             | 2.8E-06 M          | 1.7             | 4.6                                              | 3.2   |
| <b>LPA<sub>3</sub> (h) (agonist effect)</b>                  |                      |                    |                 |                                                  |       |
| 100043705-1                                                  | S-CE-123             | 2.8E-06 M          | -11.6           | 2.6                                              | -4.5  |
| <b>S<sub>1</sub>P<sub>1</sub> (h) (agonist effect)</b>       |                      |                    |                 |                                                  |       |
| 100043705-1                                                  | S-CE-123             | 2.8E-06 M          | 8.3             | 11.5                                             | 9.9   |
| <b>S<sub>1</sub>P<sub>2</sub> (h) (agonist effect)</b>       |                      |                    |                 |                                                  |       |
| 100043705-1                                                  | S-CE-123             | 2.8E-06 M          | 0.7             | -8.9                                             | -4.1  |
| <b>S<sub>1</sub>P<sub>3</sub> (h) (agonist effect)</b>       |                      |                    |                 |                                                  |       |
| 100043705-1                                                  | S-CE-123             | 2.8E-06 M          | -1.3            | -1.1                                             | -1.2  |
| <b>S1P4 (h) (agonist effect)</b>                             |                      |                    |                 |                                                  |       |
| 100043705-1                                                  | S-CE-123             | 2.8E-06 M          | -4.2            | -8.3                                             | -6.2  |
| <b>S1P5 (h) (agonist effect)</b>                             |                      |                    |                 |                                                  |       |
| 100043705-1                                                  | S-CE-123             | 2.8E-06 M          | -0.1            | -0.4                                             | -0.2  |
| <b>MCH<sub>1</sub> (h) (agonist effect)</b>                  |                      |                    |                 |                                                  |       |
| 100043705-1                                                  | S-CE-123             | 2.8E-06 M          | -0.8            | 1.0                                              | 0.1   |
| <b>MCH<sub>2</sub> (h) (agonist effect)</b>                  |                      |                    |                 |                                                  |       |
| 100043705-1                                                  | S-CE-123             | 2.8E-06 M          | 3.6             | 5.7                                              | 4.6   |
| <b>MC<sub>1</sub> (agonist effect)</b>                       |                      |                    |                 |                                                  |       |
| 100043705-1                                                  | S-CE-123             | 2.8E-06 M          | -2.0            | -2.1                                             | -2.1  |
| <b>MC<sub>2</sub> (h) (agonist effect)</b>                   |                      |                    |                 |                                                  |       |
| 100043705-1                                                  | S-CE-123             | 2.8E-06 M          | -3.8            | -1.6                                             | -2.7  |
| <b>MC<sub>3</sub> (h) (agonist effect)</b>                   |                      |                    |                 |                                                  |       |
| 100043705-1                                                  | S-CE-123             | 2.8E-06 M          | -2.5            | 0.3                                              | -1.1  |
| <b>MC<sub>4</sub> (h) (agonist effect)</b>                   |                      |                    |                 |                                                  |       |
| 100043705-1                                                  | S-CE-123             | 2.8E-06 M          | -3.2            | -0.4                                             | -1.8  |
| <b>MC<sub>5</sub> (h) (agonist effect)</b>                   |                      |                    |                 |                                                  |       |
| 100043705-1                                                  | S-CE-123             | 2.8E-06 M          | 3.0             | 3.0                                              | 3.0   |
| <b>MT<sub>1</sub> (ML<sub>1A</sub>) (h) (agonist effect)</b> |                      |                    |                 |                                                  |       |
| 100043705-1                                                  | S-CE-123             | 2.8E-06 M          | 15.2            | 18.4                                             | 16.8  |
| <b>MT<sub>2</sub> (ML<sub>1A</sub>) (h) (agonist effect)</b> |                      |                    |                 |                                                  |       |
| 100043705-1                                                  | S-CE-123             | 2.8E-06 M          | -0.8            | -59.1                                            | -29.9 |
| <b>motilin (h) (agonist effect)</b>                          |                      |                    |                 |                                                  |       |
| 100043705-1                                                  | S-CE-123             | 2.8E-06 M          | -0.7            | -2.7                                             | -1.7  |
| <b>M<sub>1</sub> (h) (agonist effect)</b>                    |                      |                    |                 |                                                  |       |
| 100043705-1                                                  | S-CE-123             | 2.8E-06 M          | -1.1            | -0.7                                             | -0.9  |
| <b>M<sub>2</sub> (h) (agonist effect)</b>                    |                      |                    |                 |                                                  |       |
| 100043705-1                                                  | S-CE-123             | 2.8E-06 M          | 16.8            | 17.3                                             | 17.1  |
| <b>M<sub>3</sub> (h) (agonist effect)</b>                    |                      |                    |                 |                                                  |       |
| 100043705-1                                                  | S-CE-123             | 2.8E-06 M          | 0.0             | 0.3                                              | 0.1   |
| <b>M<sub>4</sub> (h) (agonist effect)</b>                    |                      |                    |                 |                                                  |       |
| 100043705-1                                                  | S-CE-123             | 2.8E-06 M          | 1.7             | 1.9                                              | 1.8   |
| <b>M<sub>5</sub> (h) (agonist effect)</b>                    |                      |                    |                 |                                                  |       |
| 100043705-1                                                  | S-CE-123             | 2.8E-06 M          | 0.0             | -0.2                                             | -0.1  |
| <b>MrgD (h) (agonist effect)</b>                             |                      |                    |                 |                                                  |       |
| 100043705-1                                                  | S-CE-123             | 2.8E-06 M          | -2.0            | 3.5                                              | 0.7   |
| <b>MRGX1 / MRGPRX1 (h) (agonist effect)</b>                  |                      |                    |                 |                                                  |       |
| 100043705-1                                                  | S-CE-123             | 2.8E-06 M          | -10.7           | 0.2                                              | -5.2  |
| <b>MRGX2 / MGRPLX2 (h) (agonist effect)</b>                  |                      |                    |                 |                                                  |       |
| 100043705-1                                                  | S-CE-123             | 2.8E-06 M          | 1.7             | 2.6                                              | 2.2   |
| <b>NPS (h) (agonist effect)</b>                              |                      |                    |                 |                                                  |       |
| 100043705-1                                                  | S-CE-123             | 2.8E-06 M          | -3.3            | 1.3                                              | -1.0  |
| <b>NPBW1 (h) (agonist effect)</b>                            |                      |                    |                 |                                                  |       |
| 100043705-1                                                  | S-CE-123             | 2.8E-06 M          | -3.1            | 15.5                                             | 6.2   |

| Compound I.D.                                                    | Client Compound I.D. | Test Concentration | 1 <sup>st</sup> | % of Control Agonist Response<br>2 <sup>nd</sup> | Mean |
|------------------------------------------------------------------|----------------------|--------------------|-----------------|--------------------------------------------------|------|
| <b>NK<sub>1</sub> (h) (agonist effect)</b>                       |                      |                    |                 |                                                  |      |
| 100043705-1                                                      | S-CE-123             | 2.8E-06 M          | -0.1            | -0.1                                             | -0.1 |
| <b>NK<sub>2</sub> (h) (agonist effect)</b>                       |                      |                    |                 |                                                  |      |
| 100043705-1                                                      | S-CE-123             | 2.8E-06 M          | -0.3            | -1.4                                             | -0.9 |
| <b>NK<sub>3</sub> (h) (agonist effect)</b>                       |                      |                    |                 |                                                  |      |
| 100043705-1                                                      | S-CE-123             | 2.8E-06 M          | 0.5             | -0.8                                             | -0.2 |
| <b>NMU1 (h) (agonist effect)</b>                                 |                      |                    |                 |                                                  |      |
| 100043705-1                                                      | S-CE-123             | 2.8E-06 M          | -0.7            | -1.2                                             | -0.9 |
| <b>NMU2 (h) (agonist effect)</b>                                 |                      |                    |                 |                                                  |      |
| 100043705-1                                                      | S-CE-123             | 2.8E-06 M          | 0.1             | 0.0                                              | 0.0  |
| <b>NTS<sub>1</sub> (NT<sub>1</sub>) (h) (agonist effect)</b>     |                      |                    |                 |                                                  |      |
| 100043705-1                                                      | S-CE-123             | 2.8E-06 M          | 1.6             | -2.8                                             | -0.6 |
| <b>NTS<sub>2</sub> (NT<sub>2</sub>) (h) (agonist effect)</b>     |                      |                    |                 |                                                  |      |
| 100043705-1                                                      | S-CE-123             | 2.8E-06 M          | 0.8             | 2.9                                              | 1.9  |
| <b>δ (DOP) (h) (agonist effect)</b>                              |                      |                    |                 |                                                  |      |
| 100043705-1                                                      | S-CE-123             | 2.8E-06 M          | 1.3             | 0.9                                              | 1.1  |
| <b>κ (KOP) (agonist effect)</b>                                  |                      |                    |                 |                                                  |      |
| 100043705-1                                                      | S-CE-123             | 2.8E-06 M          | 33.6            | 9.3                                              | 21.4 |
| <b>μ (MOP) (h) (agonist effect)</b>                              |                      |                    |                 |                                                  |      |
| 100043705-1                                                      | S-CE-123             | 2.8E-06 M          | 1.6             | -4.4                                             | -1.4 |
| <b>NOP (h) (ORL1) (agonist effect)</b>                           |                      |                    |                 |                                                  |      |
| 100043705-1                                                      | S-CE-123             | 2.8E-06 M          | 20.7            | -3.6                                             | 8.6  |
| <b>OX<sub>1</sub> (h) (agonist effect)</b>                       |                      |                    |                 |                                                  |      |
| 100043705-1                                                      | S-CE-123             | 2.8E-06 M          | -9.5            | -8.8                                             | -9.2 |
| <b>OX<sub>2</sub> (h) (agonist effect)</b>                       |                      |                    |                 |                                                  |      |
| 100043705-1                                                      | S-CE-123             | 2.8E-06 M          | 1.5             | 0.3                                              | 0.9  |
| <b>PAF (h) (agonist effect)</b>                                  |                      |                    |                 |                                                  |      |
| 100043705-1                                                      | S-CE-123             | 2.8E-06 M          | 1.8             | 2.0                                              | 1.9  |
| <b>PTH1 (h) (agonist effect)</b>                                 |                      |                    |                 |                                                  |      |
| 100043705-1                                                      | S-CE-123             | 2.8E-06 M          | -3.8            | -2.9                                             | -3.4 |
| <b>PK<sub>1</sub> (h) (agonist effect)</b>                       |                      |                    |                 |                                                  |      |
| 100043705-1                                                      | S-CE-123             | 2.8E-06 M          | -5.1            | 0.6                                              | -2.3 |
| <b>PK<sub>2</sub> (h) (agonist effect)</b>                       |                      |                    |                 |                                                  |      |
| 100043705-1                                                      | S-CE-123             | 2.8E-06 M          | -0.8            | -2.4                                             | -1.6 |
| <b>DP<sub>1</sub> (h) (agonist effect)</b>                       |                      |                    |                 |                                                  |      |
| 100043705-1                                                      | S-CE-123             | 2.8E-06 M          | -1.0            | -4.3                                             | -2.7 |
| <b>EP<sub>1</sub> (h) (agonist effect)</b>                       |                      |                    |                 |                                                  |      |
| 100043705-1                                                      | S-CE-123             | 2.8E-06 M          | 4.6             | 0.8                                              | 2.7  |
| <b>EP<sub>2</sub> (h) (agonist effect)</b>                       |                      |                    |                 |                                                  |      |
| 100043705-1                                                      | S-CE-123             | 2.8E-06 M          | 1.8             | 2.2                                              | 2.0  |
| <b>EP<sub>3</sub> (h) (agonist effect)</b>                       |                      |                    |                 |                                                  |      |
| 100043705-1                                                      | S-CE-123             | 2.8E-06 M          | 2.3             | 2.2                                              | 2.3  |
| <b>EP<sub>4</sub> (h) (agonist effect)</b>                       |                      |                    |                 |                                                  |      |
| 100043705-1                                                      | S-CE-123             | 2.8E-06 M          | 4.6             | -0.3                                             | 2.2  |
| <b>FP (h) (agonist effect)</b>                                   |                      |                    |                 |                                                  |      |
| 100043705-1                                                      | S-CE-123             | 2.8E-06 M          | -1.9            | -1.9                                             | -1.9 |
| <b>IP (PGI<sub>2</sub>) (h) (agonist effect)</b>                 |                      |                    |                 |                                                  |      |
| 100043705-1                                                      | S-CE-123             | 2.8E-06 M          | 0.6             | -1.6                                             | -0.5 |
| <b>TP (TXA<sub>2</sub>/PGH<sub>2</sub>) (h) (agonist effect)</b> |                      |                    |                 |                                                  |      |
| 100043705-1                                                      | S-CE-123             | 2.8E-06 M          | -0.4            | -1.0                                             | -0.7 |
| <b>PAR1 (h) (agonist effect)</b>                                 |                      |                    |                 |                                                  |      |
| 100043705-1                                                      | S-CE-123             | 2.8E-06 M          | 0.6             | 0.0                                              | 0.3  |
| <b>PAR2 (h) (agonist effect)</b>                                 |                      |                    |                 |                                                  |      |
| 100043705-1                                                      | S-CE-123             | 2.8E-06 M          | -0.9            | 15.0                                             | 7.1  |
| <b>P2Y1 (h) (agonist effect)</b>                                 |                      |                    |                 |                                                  |      |
| 100043705-1                                                      | S-CE-123             | 2.8E-06 M          | 0.9             | 3.1                                              | 2.0  |

| Compound I.D.                                                  | Client Compound I.D. | Test Concentration | 1 <sup>st</sup> | % of Control Agonist Response<br>2 <sup>nd</sup> | Mean  |
|----------------------------------------------------------------|----------------------|--------------------|-----------------|--------------------------------------------------|-------|
| <b>P2Y<sub>2</sub> (h) (agonist effect)</b>                    |                      |                    |                 |                                                  |       |
| 100043705-1                                                    | S-CE-123             | 2.8E-06 M          | 2.4             | -1.1                                             | 0.6   |
| <b>P2Y<sub>4</sub> (h) (agonist effect)</b>                    |                      |                    |                 |                                                  |       |
| 100043705-1                                                    | S-CE-123             | 2.8E-06 M          | -0.8            | -1.2                                             | -1.0  |
| <b>P2Y<sub>6</sub> (h) (agonist effect)</b>                    |                      |                    |                 |                                                  |       |
| 100043705-1                                                    | S-CE-123             | 2.8E-06 M          | -4.0            | 0.3                                              | -1.8  |
| <b>P2Y<sub>11</sub> (h) (agonist effect)</b>                   |                      |                    |                 |                                                  |       |
| 100043705-1                                                    | S-CE-123             | 2.8E-06 M          | 0.3             | 3.0                                              | 1.7   |
| <b>PTH2 (h) (agonist effect)</b>                               |                      |                    |                 |                                                  |       |
| 100043705-1                                                    | S-CE-123             | 2.8E-06 M          | -4.1            | -4.5                                             | -4.3  |
| <b>RXFP1 (h) (agonist effect)</b>                              |                      |                    |                 |                                                  |       |
| 100043705-1                                                    | S-CE-123             | 2.8E-06 M          | -3.5            | -0.5                                             | -2.0  |
| <b>5-HT<sub>1A</sub> (h) (agonist effect)</b>                  |                      |                    |                 |                                                  |       |
| 100043705-1                                                    | S-CE-123             | 2.8E-06 M          | 0.6             | -0.6                                             | 0.0   |
| <b>5HT<sub>1B</sub> (h) (agonist effect)</b>                   |                      |                    |                 |                                                  |       |
| 100043705-1                                                    | S-CE-123             | 2.8E-06 M          | -30.4           | -31.0                                            | -30.7 |
| <b>5-HT<sub>1D</sub> (agonist effect)</b>                      |                      |                    |                 |                                                  |       |
| 100043705-1                                                    | S-CE-123             | 2.8E-06 M          | 3.4             | 2.1                                              | 2.8   |
| <b>5-HT<sub>2A</sub> (h) (agonist effect)</b>                  |                      |                    |                 |                                                  |       |
| 100043705-1                                                    | S-CE-123             | 2.8E-06 M          | 2.0             | -2.5                                             | -0.3  |
| <b>5-HT<sub>2B</sub> (h) (agonist effect)</b>                  |                      |                    |                 |                                                  |       |
| 100043705-1                                                    | S-CE-123             | 2.8E-06 M          | 0.9             | 4.4                                              | 2.7   |
| <b>5-HT<sub>2C</sub> (h) (agonist effect)</b>                  |                      |                    |                 |                                                  |       |
| 100043705-1                                                    | S-CE-123             | 2.8E-06 M          | 1.4             | -0.8                                             | 0.3   |
| <b>5-HT<sub>4a</sub> (h) (agonist effect)</b>                  |                      |                    |                 |                                                  |       |
| 100043705-1                                                    | S-CE-123             | 2.8E-06 M          | -2.9            | 0.0                                              | -1.4  |
| <b>5-HT<sub>4</sub> (h) (agonist effect)</b>                   |                      |                    |                 |                                                  |       |
| 100043705-1                                                    | S-CE-123             | 2.8E-06 M          | 1.9             | -5.5                                             | -1.8  |
| <b>5-HT<sub>7</sub> (h) (agonist effect)</b>                   |                      |                    |                 |                                                  |       |
| 100043705-1                                                    | S-CE-123             | 2.8E-06 M          | -3.5            | 3.2                                              | -0.2  |
| <b>sst<sub>1</sub> (h) (agonist effect)</b>                    |                      |                    |                 |                                                  |       |
| 100043705-1                                                    | S-CE-123             | 2.8E-06 M          | -20.0           | -1.7                                             | -10.9 |
| <b>sst<sub>2</sub> (h) (agonist effect)</b>                    |                      |                    |                 |                                                  |       |
| 100043705-1                                                    | S-CE-123             | 2.8E-06 M          | 0.6             | -0.5                                             | 0.1   |
| <b>sst<sub>3</sub> (h) (agonist effect)</b>                    |                      |                    |                 |                                                  |       |
| 100043705-1                                                    | S-CE-123             | 2.8E-06 M          | 0.9             | 0.4                                              | 0.6   |
| <b>sst<sub>4</sub> (h) (agonist effect)</b>                    |                      |                    |                 |                                                  |       |
| 100043705-1                                                    | S-CE-123             | 2.8E-06 M          | 24.2            | 19.9                                             | 22.0  |
| <b>sst<sub>5</sub> (h) (agonist effect)</b>                    |                      |                    |                 |                                                  |       |
| 100043705-1                                                    | S-CE-123             | 2.8E-06 M          | 6.4             | 45.7                                             | 26.0  |
| <b>SUCNR1/GPR91 (h) (agonist effect)</b>                       |                      |                    |                 |                                                  |       |
| 100043705-1                                                    | S-CE-123             | 2.8E-06 M          | -0.2            | -0.2                                             | -0.2  |
| <b>TRH<sub>1</sub> (h) (agonist effect)</b>                    |                      |                    |                 |                                                  |       |
| 100043705-1                                                    | S-CE-123             | 2.8E-06 M          | -1.0            | -0.6                                             | -0.8  |
| <b>UT (h) (agonist effect)</b>                                 |                      |                    |                 |                                                  |       |
| 100043705-1                                                    | S-CE-123             | 2.8E-06 M          | 0.5             | 1.3                                              | 0.9   |
| <b>PAC<sub>1</sub> (PACAP) (h) (agonist effect)</b>            |                      |                    |                 |                                                  |       |
| 100043705-1                                                    | S-CE-123             | 2.8E-06 M          | -0.1            | 0.1                                              | 0.0   |
| <b>VPAC<sub>1</sub> (VIP<sub>1</sub>) (h) (agonist effect)</b> |                      |                    |                 |                                                  |       |
| 100043705-1                                                    | S-CE-123             | 2.8E-06 M          | -2.5            | -1.2                                             | -1.8  |
| <b>VPAC<sub>2</sub> (VIP<sub>2</sub>) (h) (agonist effect)</b> |                      |                    |                 |                                                  |       |
| 100043705-1                                                    | S-CE-123             | 2.8E-06 M          | -5.7            | 0.8                                              | -2.5  |
| <b>Y4 (h) (agonist effect)</b>                                 |                      |                    |                 |                                                  |       |
| 100043705-1                                                    | S-CE-123             | 2.8E-06 M          | 0.2             | 0.1                                              | 0.1   |
| <b>V<sub>1a</sub> (h) (agonist effect)</b>                     |                      |                    |                 |                                                  |       |
| 100043705-1                                                    | S-CE-123             | 2.8E-06 M          | -2.8            | -1.5                                             | -2.1  |
| <b>V1B (h) (agonist effect)</b>                                |                      |                    |                 |                                                  |       |
| 100043705-1                                                    | S-CE-123             | 2.8E-06 M          | 0.9             | -0.3                                             | 0.3   |
| <b>V<sub>2</sub> (h) (agonist effect)</b>                      |                      |                    |                 |                                                  |       |
| 100043705-1                                                    | S-CE-123             | 2.8E-06 M          | -0.4            | -6.1                                             | -3.3  |



Table S2 Reference compounds for agonist effect.

| Compound I.D.                               | EC <sub>50</sub> (M) | nH  |
|---------------------------------------------|----------------------|-----|
| <b>A1 (h) (agonist effect)</b>              |                      |     |
| CPA                                         | 1.6E-09 M            | n/a |
| <b>A<sub>2A</sub> (h) (agonist effect)</b>  |                      |     |
| NECA                                        | 1.3E-08 M            | n/a |
| <b>A<sub>2B</sub> (h) (agonist effect)</b>  |                      |     |
| NECA                                        | 8.5E-08 M            | n/a |
| <b>A<sub>3</sub> (h) (agonist effect)</b>   |                      |     |
| IB-MECA                                     | 5.6E-10 M            | n/a |
| <b>α<sub>1A</sub> (h) (agonist effect)</b>  |                      |     |
| epinephrine                                 | 5.8E-10 M            | n/a |
| <b>α<sub>1B</sub> (h) (agonist effect)</b>  |                      |     |
| epinephrine                                 | 1.9E-07 M            | n/a |
| <b>α<sub>1D</sub> (h) (agonist effect)</b>  |                      |     |
| Epinephrine                                 | 1.6E-09 M            | n/a |
| <b>α<sub>2A</sub> (h) (agonist effect)</b>  |                      |     |
| Epinephrine                                 | 3.3E-10 M            | n/a |
| <b>α<sub>2B</sub> (h) (agonist effect)</b>  |                      |     |
| dexmedetomidine                             | 1.9E-08 M            | n/a |
| <b>α<sub>2C</sub> (h) (agonist effect)</b>  |                      |     |
| epinephrine                                 | 1.4E-09 M            | n/a |
| <b>β<sub>1</sub> (h) (agonist effect)</b>   |                      |     |
| isoproterenol                               | 6.0E-10 M            | n/a |
| <b>β<sub>2</sub> (h) (agonist effect)</b>   |                      |     |
| isoproterenol                               | 3.9E-09 M            | n/a |
| <b>β<sub>3</sub> (h) (agonist effect)</b>   |                      |     |
| isoproterenol                               | 4.7E-07 M            | n/a |
| <b>AT<sub>1</sub> (h) (agonist effect)</b>  |                      |     |
| angiotensin-II                              | 1.2E-10 M            | n/a |
| <b>APJ (apelin) (h) (agonist effect)</b>    |                      |     |
| apelin-13                                   | 7.3E-11 M            | n/a |
| <b>TGR5 (h) (agonist effect)</b>            |                      |     |
| Lithocholic Acid                            | 8.2E-07 M            | n/a |
| <b>BB<sub>1</sub> (h) (agonist effect)</b>  |                      |     |
| neuromedin B                                | 5.0E-13 M            | n/a |
| <b>BB<sub>2</sub> (h) (agonist effect)</b>  |                      |     |
| GRP                                         | 2.7E-11 M            | n/a |
| <b>BB<sub>3</sub> (h) (agonist effect)</b>  |                      |     |
| Bn(6-14)                                    | 2.1E-09 M            | n/a |
| <b>B<sub>1</sub> (h) (agonist effect)</b>   |                      |     |
| LysdesArg <sup>9</sup> -BK                  | 2.1E-10 M            | n/a |
| <b>B<sub>2</sub> (h) (agonist effect)</b>   |                      |     |
| bradykinin                                  | 5.1E-12 M            | n/a |
| <b>CGRP (h) (agonist effect)</b>            |                      |     |
| hCGRPα                                      | 4.5E-11 M            | n/a |
| <b>CT (Calcitonin) (h) (agonist effect)</b> |                      |     |
| human calcitonin                            | 8.6E-10 M            | n/a |
| <b>CaS (h) (agonist effect)</b>             |                      |     |
| neomycin                                    | 1.7E-05 M            | n/a |

| Compound I.D.                                                 | EC <sub>50</sub> (M) | nH  |
|---------------------------------------------------------------|----------------------|-----|
| <b>CB<sub>1</sub> (h) (agonist effect)</b>                    |                      |     |
| CP 55940                                                      | 5.1E-11 M            | n/a |
| <b>CB<sub>2</sub> (h) (agonist effect)</b>                    |                      |     |
| WIN 55212-2                                                   | 1.4E-10 M            | n/a |
| <b>CCR1 (h) (agonist effect)</b>                              |                      |     |
| MIP-1α                                                        | 1.2E-10 M            | n/a |
| <b>CCR2 (h) (agonist effect)</b>                              |                      |     |
| MCP-1                                                         | 1.5E-09 M            | n/a |
| <b>CCR3 (h) (agonist effect)</b>                              |                      |     |
| Human Eotaxin(CCL11)                                          | 1.7E-09 M            | n/a |
| <b>CCR4 (h) (agonist effect)</b>                              |                      |     |
| TARC                                                          | 2.4E-10 M            | n/a |
| <b>CCR5 (agonist effect)</b>                                  |                      |     |
| MIP-1α                                                        | 5.0E-09 M            | n/a |
| <b>CCR6 (h) (agonist effect)</b>                              |                      |     |
| MIP-3α                                                        | 1.8E-10 M            | n/a |
| <b>CCR7 (h) (agonist effect)</b>                              |                      |     |
| MIP-3β                                                        | 3.4E-10 M            | n/a |
| <b>CCR8 (h) (agonist effect)</b>                              |                      |     |
| I-309                                                         | 2.5E-10 M            | n/a |
| <b>CCR10 (h) (agonist effect)</b>                             |                      |     |
| CTACK/CCL27                                                   | 6.5E-09 M            | n/a |
| <b>CX3CR1 (h) (agonist effect)</b>                            |                      |     |
| Human Fractalkine(CX3CL1)                                     | 9.0E-10 M            | n/a |
| <b>CXCR1 (h) (agonist effect)</b>                             |                      |     |
| rhIL-8                                                        | 2.9E-10 M            | n/a |
| <b>CXCR2 (h) (agonist effect)</b>                             |                      |     |
| rhGROα                                                        | 4.9E-10 M            | n/a |
| <b>CXCR3 (h) (agonist effect)</b>                             |                      |     |
| I-TAC                                                         | 3.2E-09 M            | n/a |
| <b>CXCR4 (h) (agonist effect)</b>                             |                      |     |
| SDF-1α                                                        | 2.4E-10 M            | n/a |
| <b>CXCR5 (h) (agonist effect)</b>                             |                      |     |
| CXCL13/BLC/BCA-1                                              | 2.5E-09 M            | n/a |
| <b>CXCR6 (h) (agonist effect)</b>                             |                      |     |
| CXCL16                                                        | 1.7E-09 M            | n/a |
| <b>CCK<sub>1</sub> (CCK<sub>A</sub>) (h) (agonist effect)</b> |                      |     |
| CCK-8s                                                        | 6.3E-08 M            | n/a |
| <b>CCK<sub>2</sub> (CCK<sub>B</sub>) (h) (agonist effect)</b> |                      |     |
| CCK-8s                                                        | 2.4E-09 M            | n/a |
| <b>C3aR (h) (agonist effect)</b>                              |                      |     |
| Complement C3a human                                          | 7.0E-10 M            | n/a |
| <b>ChemR23 (h) (agonist effect)</b>                           |                      |     |
| Chemerin                                                      | 9.6E-10 M            | n/a |
| <b>CRF<sub>1</sub> (h) (agonist effect)</b>                   |                      |     |
| ovine CRF                                                     | 9.6E-09 M            | n/a |
| <b>CRF<sub>2</sub> (h) (agonist effect)</b>                   |                      |     |
| human CRF                                                     | 4.7E-08 M            | n/a |
| <b>XCR1 / GPR5 (h) (agonist effect)</b>                       |                      |     |
| Lymphotoxin                                                   | 1.3E-09 M            | n/a |
| <b>D<sub>1</sub> (h) (agonist effect)</b>                     |                      |     |
| dopamine                                                      | 2.1E-08 M            | n/a |
| <b>D<sub>2S</sub> (h) (agonist effect)</b>                    |                      |     |
| dopamine                                                      | 3.3E-09 M            | n/a |
| <b>D<sub>3</sub> (h) (agonist effect)</b>                     |                      |     |
| dopamine                                                      | 3.5E-09 M            | n/a |
| <b>D<sub>4.4</sub> (h) (agonist effect)</b>                   |                      |     |
| dopamine                                                      | 1.2E-08 M            | n/a |

| Compound I.D.                                                 | EC <sub>50</sub> (M) | nH  |
|---------------------------------------------------------------|----------------------|-----|
| <b>D<sub>2</sub> (h) (agonist effect)</b>                     |                      |     |
| dopamine                                                      | 1.1E-08 M            | n/a |
| <b>ET<sub>A</sub> (h) (agonist effect)</b>                    |                      |     |
| endothelin-1                                                  | 4.5E-10 M            | n/a |
| <b>ET<sub>B</sub> (h) (agonist effect)</b>                    |                      |     |
| endothelin-1                                                  | 1.7E-10 M            | n/a |
| <b>FFA1 (h) (GPR40) (agonist effect)</b>                      |                      |     |
| linoleic acid                                                 | 6.2E-06 M            | n/a |
| <b>FFA2 (h) (GPR43) (agonist effect)</b>                      |                      |     |
| sodium acetate                                                | 1.9E-04 M            | n/a |
| <b>FFA3 (h) (GPR41) (agonist effect)</b>                      |                      |     |
| sodium propionate                                             | 2.0E-06 M            | n/a |
| <b>FFA4 (GPR120) (h) (agonist effect)</b>                     |                      |     |
| GW9508                                                        | 7.4E-06 M            | n/a |
| <b>GnRH (h) (agonist effect)</b>                              |                      |     |
| LHRH                                                          | 4.1E-10 M            | n/a |
| <b>GPR39 (h) (agonist effect)</b>                             |                      |     |
| ZnCl <sub>2</sub>                                             | 1.7E-05 M            | n/a |
| <b>OXGR1 GPR99 (h) (agonist effect)</b>                       |                      |     |
| alpha Ketoglutaric acid                                       | 1.8E-04 M            | n/a |
| <b>GPR103/QRFP (h) (agonist effect)</b>                       |                      |     |
| 26Rfa Hypothalamic Peptide(Peptide 518)                       | 4.9E-10 M            | n/a |
| <b>GPR109A (h) (agonist effect)</b>                           |                      |     |
| Nicotinic Acid Free Acid                                      | 4.7E-08 M            | n/a |
| <b>GPR119 (agonist effect)</b>                                |                      |     |
| AR231453                                                      | 3.4E-08 M            | n/a |
| <b>FPR1 (h) (agonist effect)</b>                              |                      |     |
| fMLP                                                          | 1.6E-10 M            | n/a |
| <b>GABAB1b beta (h) (agonist effect)</b>                      |                      |     |
| 3-APMPA                                                       | 1.2E-07 M            | n/a |
| <b>GAL1 (h) (agonist effect)</b>                              |                      |     |
| Galanin (1-30)                                                | 1.4E-10 M            | n/a |
| <b>GAL<sub>2</sub> (h) (agonist effect)</b>                   |                      |     |
| human galanin                                                 | 3.4E-10 M            | n/a |
| <b>GIP (h) (agonist effect)</b>                               |                      |     |
| GIP                                                           | 6.1E-10 M            | n/a |
| <b>GLP-1 (agonist effect)</b>                                 |                      |     |
| GLP-1(7-37)                                                   | 7.6E-11 M            | n/a |
| <b>secretin (h) (agonist effect)</b>                          |                      |     |
| human secretin                                                | 1.2E-10 M            | n/a |
| <b>TSH (h) (agonist effect)</b>                               |                      |     |
| TSH                                                           | 2.2E-08 M            | n/a |
| <b>GHRH (h) (agonist effect)</b>                              |                      |     |
| human GHRF(1-29)                                              | 2.3E-09 M            | n/a |
| <b>Ghrelin / GHSR-1a (h) (agonist effect)</b>                 |                      |     |
| Ghrelin(human)                                                | 4.0E-10 M            | n/a |
| <b>H<sub>1</sub> (h) (agonist effect)</b>                     |                      |     |
| histamine                                                     | 4.7E-08 M            | n/a |
| <b>H<sub>2</sub> (h) (agonist effect)</b>                     |                      |     |
| histamine                                                     | 4.8E-07 M            | n/a |
| <b>H<sub>3</sub> (h) (agonist effect)</b>                     |                      |     |
| histamine                                                     | 3.2E-08 M            | n/a |
| <b>H<sub>4</sub> (h) (agonist effect)</b>                     |                      |     |
| histamine                                                     | 4.8E-09 M            | n/a |
| <b>KISS1 / GPR54 (h) (agonist effect)</b>                     |                      |     |
| Metastin 45-54                                                | 2.4E-09 M            | n/a |
| <b>BLT<sub>1</sub> (LTB<sub>4</sub>) (h) (agonist effect)</b> |                      |     |
| LTB <sub>4</sub>                                              | 4.6E-10 M            | n/a |

| Compound I.D.                                                    | EC <sub>50</sub> (M) | nH  |
|------------------------------------------------------------------|----------------------|-----|
| <b>NPBW1 (h) (agonist effect)</b>                                |                      |     |
| NPB29                                                            | 1.8E-10 M            | n/a |
| <b>NK<sub>1</sub> (h) (agonist effect)</b>                       |                      |     |
| [Sar <sup>9</sup> ,Met(O <sub>2</sub> ) <sup>11</sup> ]-SP       | 6.3E-11 M            | n/a |
| <b>NK<sub>2</sub> (h) (agonist effect)</b>                       |                      |     |
| [Nleu <sup>10</sup> ]-NKA (4-10)                                 | 1.3E-09 M            | n/a |
| <b>NK<sub>2</sub> (h) (agonist effect)</b>                       |                      |     |
| [MePhe <sup>7</sup> ]-NKB                                        | 4.9E-11 M            | n/a |
| <b>NMU1 (h) (agonist effect)</b>                                 |                      |     |
| NMU-25 (human)                                                   | 1.0E-10 M            | n/a |
| <b>NMU2 (h) (agonist effect)</b>                                 |                      |     |
| Neuromedian U-25                                                 | 6.3E-10 M            | n/a |
| <b>NTS<sub>1</sub> (NT<sub>1</sub>) (h) (agonist effect)</b>     |                      |     |
| neurotensin                                                      | 1.5E-11 M            | n/a |
| <b>NTS<sub>2</sub> (NT2) (h) (agonist effect)</b>                |                      |     |
| SR 142948                                                        | 3.3E-09 M            | n/a |
| <b>δ (DOP) (h) (agonist effect)</b>                              |                      |     |
| DPDPE                                                            | 3.6E-09 M            | n/a |
| <b>κ (KOP) (agonist effect)</b>                                  |                      |     |
| U 50488                                                          | 2.8E-10 M            | n/a |
| <b>μ (MOP) (h) (agonist effect)</b>                              |                      |     |
| DAMGO                                                            | 1.8E-09 M            | n/a |
| <b>NOP (h) (ORL1) (agonist effect)</b>                           |                      |     |
| nociceptin                                                       | 3.1E-11 M            | n/a |
| <b>OX<sub>1</sub> (h) (agonist effect)</b>                       |                      |     |
| orexin-A                                                         | 3.4E-10 M            | n/a |
| <b>OX<sub>2</sub> (h) (agonist effect)</b>                       |                      |     |
| orexin-B                                                         | 9.5E-10 M            | n/a |
| <b>PAF (h) (agonist effect)</b>                                  |                      |     |
| PAF(C16)                                                         | 4.9E-10 M            | n/a |
| <b>PTH1 (h) (agonist effect)</b>                                 |                      |     |
| PTHrP (1-34)                                                     | 1.0E-10 M            | n/a |
| <b>PK<sub>1</sub> (h) (agonist effect)</b>                       |                      |     |
| PK1                                                              | 1.7E-09 M            | n/a |
| <b>PK<sub>2</sub> (h) (agonist effect)</b>                       |                      |     |
| PK2                                                              | 5.3E-10 M            | n/a |
| <b>DP<sub>1</sub> (h) (agonist effect)</b>                       |                      |     |
| BW 245C                                                          | 2.2E-09 M            | n/a |
| <b>EP<sub>1</sub> (h) (agonist effect)</b>                       |                      |     |
| PGE <sub>2</sub>                                                 | 1.6E-10 M            | n/a |
| <b>EP<sub>2</sub> (h) (agonist effect)</b>                       |                      |     |
| PGE <sub>2</sub>                                                 | 1.2E-08 M            | n/a |
| <b>EP3 (h) (agonist effect)</b>                                  |                      |     |
| Prostaglandin E2                                                 | 1.2E-09 M            | n/a |
| <b>EP<sub>4</sub> (h) (agonist effect)</b>                       |                      |     |
| PGE <sub>2</sub>                                                 | 3.2E-09 M            | n/a |
| <b>FP (h) (agonist effect)</b>                                   |                      |     |
| PGF2alpha                                                        | 5.2E-10 M            | n/a |
| <b>IP (PGI<sub>2</sub>) (h) (agonist effect)</b>                 |                      |     |
| iloprost                                                         | 3.7E-10 M            | n/a |
| <b>TP (TXA<sub>2</sub>/PGH<sub>2</sub>) (h) (agonist effect)</b> |                      |     |
| U 44069                                                          | 1.3E-09 M            | n/a |
| <b>PAR1 (h) (agonist effect)</b>                                 |                      |     |
| TFLLR-NH <sub>2</sub>                                            | 1.4E-06 M            | n/a |
| <b>PAR2 (h) (agonist effect)</b>                                 |                      |     |
| trypsin                                                          | 1.2E-08 M            | n/a |
| <b>P2Y1 (h) (agonist effect)</b>                                 |                      |     |
| 2MeSATP                                                          | 6.0E-10 M            | n/a |

| Compound I.D.                                                   | EC <sub>50</sub> (M) | nH  |
|-----------------------------------------------------------------|----------------------|-----|
| <b>CysLT<sub>1</sub> (LTD<sub>4</sub>) (h) (agonist effect)</b> |                      |     |
| LTD <sub>4</sub>                                                | 2.6E-11 M            | n/a |
| <b>CysLT<sub>2</sub> (LTC<sub>4</sub>) (h) (agonist effect)</b> |                      |     |
| LTC <sub>4</sub>                                                | 1.7E-09 M            | n/a |
| <b>LPA1(h) (agonist effect)</b>                                 |                      |     |
| Oleoyl-LPA                                                      | 1.0E-07 M            | n/a |
| <b>LPA<sub>2</sub> (h) (agonist effect)</b>                     |                      |     |
| LPA                                                             | 3.8E-09 M            | n/a |
| <b>LPA<sub>3</sub> (h) (agonist effect)</b>                     |                      |     |
| LPA                                                             | 9.2E-09 M            | n/a |
| <b>S<sub>1</sub>P<sub>1</sub> (h) (agonist effect)</b>          |                      |     |
| S1P                                                             | 8.1E-10 M            | n/a |
| <b>S<sub>1</sub>P<sub>2</sub> (h) (agonist effect)</b>          |                      |     |
| S <sub>1</sub> P                                                | 1.1E-08 M            | n/a |
| <b>S<sub>1</sub>P<sub>3</sub> (h) (agonist effect)</b>          |                      |     |
| S <sub>1</sub> P                                                | 1.1E-09 M            | n/a |
| <b>S1P4 (h) (agonist effect)</b>                                |                      |     |
| Sphingosine 1-phosphate (S1P)                                   | 5.2E-09 M            | n/a |
| <b>S1P5 (h) (agonist effect)</b>                                |                      |     |
| Sphingosine 1-phosphate (S1P)                                   | 1.3E-08 M            | n/a |
| <b>MCH<sub>1</sub> (h) (agonist effect)</b>                     |                      |     |
| human MCH                                                       | 1.4E-09 M            | n/a |
| <b>MCH<sub>2</sub> (h) (agonist effect)</b>                     |                      |     |
| human MCH                                                       | 8.4E-10 M            | n/a |
| <b>MC<sub>1</sub> (agonist effect)</b>                          |                      |     |
| NDP-α-MSH                                                       | 2.5E-10 M            | n/a |
| <b>MC<sub>2</sub> (h) (agonist effect)</b>                      |                      |     |
| ACTH (1-39)                                                     | 4.2E-09 M            | n/a |
| <b>MC<sub>3</sub> (h) (agonist effect)</b>                      |                      |     |
| NDP-α-MSH                                                       | 8.2E-10 M            | n/a |
| <b>MC<sub>4</sub> (h) (agonist effect)</b>                      |                      |     |
| NDP-α-MSH                                                       | 1.0E-10 M            | n/a |
| <b>MC<sub>5</sub> (h) (agonist effect)</b>                      |                      |     |
| α-MSH                                                           | 3.9E-07 M            | n/a |
| <b>MT<sub>1</sub> (ML<sub>1A</sub>) (h) (agonist effect)</b>    |                      |     |
| melatonin                                                       | 3.3E-11 M            | n/a |
| <b>MT<sub>2</sub> (ML<sub>1B</sub>) (h) (agonist effect)</b>    |                      |     |
| melatonin                                                       | 6.5E-11 M            | n/a |
| <b>motilin (h) (agonist effect)</b>                             |                      |     |
| motilin                                                         | 8.0E-12 M            | n/a |
| <b>M<sub>1</sub> (h) (agonist effect)</b>                       |                      |     |
| acetylcholine                                                   | 9.6E-10 M            | n/a |
| <b>M<sub>2</sub> (h) (agonist effect)</b>                       |                      |     |
| acetylcholine                                                   | 6.2E-08 M            | n/a |
| <b>M<sub>3</sub> (h) (agonist effect)</b>                       |                      |     |
| acetylcholine                                                   | 1.1E-08 M            | n/a |
| <b>M<sub>4</sub> (h) (agonist effect)</b>                       |                      |     |
| acetylcholine                                                   | 1.4E-08 M            | n/a |
| <b>M<sub>5</sub> (h) (agonist effect)</b>                       |                      |     |
| Acetylcholine                                                   | 1.1E-09 M            | n/a |
| <b>MrgD (h) (agonist effect)</b>                                |                      |     |
| Beta-alanine                                                    | 1.4E-06 M            | n/a |
| <b>MRGX1 / MRGPRX1 (h) (agonist effect)</b>                     |                      |     |
| BAM(8-22)                                                       | 2.1E-09 M            | n/a |
| <b>MRGX2 / MGRPLX2 (h) (agonist effect)</b>                     |                      |     |
| Proadrenomedullin fragment, 1-20 (PAMP)                         | 8.5E-08 M            | n/a |
| <b>NPS (h) (agonist effect)</b>                                 |                      |     |
| NPS                                                             | 6.0E-10 M            | n/a |

| Compound I.D.                                                  | EC <sub>50</sub> (M) | nH  |
|----------------------------------------------------------------|----------------------|-----|
| <b>P2Y<sub>2</sub> (h) (agonist effect)</b>                    |                      |     |
| UTP                                                            | 4.4E-08 M            | n/a |
| <b>P2Y<sub>6</sub> (h) (agonist effect)</b>                    |                      |     |
| UTP                                                            | 5.6E-09 M            | n/a |
| <b>P2Y<sub>6</sub> (h) (agonist effect)</b>                    |                      |     |
| UDP                                                            | 1.1E-09 M            | n/a |
| <b>P2Y<sub>11</sub> (h) (agonist effect)</b>                   |                      |     |
| ATP                                                            | 6.6E-06 M            | n/a |
| <b>PTH2 (h) (agonist effect)</b>                               |                      |     |
| TIP-39                                                         | 7.0E-09 M            | n/a |
| <b>RXFP1 (h) (agonist effect)</b>                              |                      |     |
| H2 relaxin                                                     | 5.5E-10 M            | n/a |
| <b>5-HT<sub>1A</sub> (h) (agonist effect)</b>                  |                      |     |
| Serotonine                                                     | 1.5E-09 M            | n/a |
| <b>5HT<sub>1B</sub> (h) (agonist effect)</b>                   |                      |     |
| 5-HT                                                           | 2.1E-08 M            | n/a |
| <b>5-HT<sub>1D</sub> (agonist effect)</b>                      |                      |     |
| serotonin                                                      | 5.6E-10 M            | n/a |
| <b>5-HT<sub>2A</sub> (h) (agonist effect)</b>                  |                      |     |
| serotonin                                                      | 2.7E-08 M            | n/a |
| <b>5-HT<sub>2B</sub> (h) (agonist effect)</b>                  |                      |     |
| serotonin                                                      | 5.0E-09 M            | n/a |
| <b>5-HT<sub>2C</sub> (h) (agonist effect)</b>                  |                      |     |
| serotonin                                                      | 3.3E-09 M            | n/a |
| <b>5-HT<sub>4a</sub> (h) (agonist effect)</b>                  |                      |     |
| serotonin                                                      | 1.5E-09 M            | n/a |
| <b>5-HT<sub>4</sub> (h) (agonist effect)</b>                   |                      |     |
| serotonin                                                      | 6.0E-08 M            | n/a |
| <b>5-HT<sub>7</sub> (h) (agonist effect)</b>                   |                      |     |
| serotonin                                                      | 5.2E-08 M            | n/a |
| <b>sst<sub>1</sub> (h) (agonist effect)</b>                    |                      |     |
| somatostatin-28                                                | 1.3E-10 M            | n/a |
| <b>sst<sub>2</sub> (h) (agonist effect)</b>                    |                      |     |
| Somatostatin                                                   | 7.6E-10 M            | n/a |
| <b>sst<sub>3</sub> (h) (agonist effect)</b>                    |                      |     |
| Somatostatin                                                   | 7.7E-10 M            | n/a |
| <b>sst<sub>4</sub> (h) (agonist effect)</b>                    |                      |     |
| somatostatin-14                                                | 8.2E-11 M            | n/a |
| <b>sst<sub>5</sub> (h) (agonist effect)</b>                    |                      |     |
| somatostatin-14                                                | 6.6E-09 M            | n/a |
| <b>SUCNR1/GPR91 (h) (agonist effect)</b>                       |                      |     |
| Sodium Succinate                                               | 6.8E-05 M            | n/a |
| <b>TRH<sub>1</sub> (h) (agonist effect)</b>                    |                      |     |
| TRH                                                            | 7.2E-11 M            | n/a |
| <b>UT (h) (agonist effect)</b>                                 |                      |     |
| human urotensin-II                                             | 7.0E-10 M            | n/a |
| <b>PAC<sub>1</sub> (PACAP) (h) (agonist effect)</b>            |                      |     |
| PACAP <sub>1-38</sub>                                          | 1.7E-10 M            | n/a |
| <b>VPAC<sub>1</sub> (VIP<sub>1</sub>) (h) (agonist effect)</b> |                      |     |
| VIP                                                            | 1.6E-10 M            | n/a |
| <b>VPAC<sub>2</sub> (VIP<sub>2</sub>) (h) (agonist effect)</b> |                      |     |
| VIP                                                            | 3.7E-09 M            | n/a |
| <b>Y4 (h) (agonist effect)</b>                                 |                      |     |
| Pancreatic polypeptide human                                   | 1.3E-10 M            | n/a |
| <b>V<sub>1a</sub> (h) (agonist effect)</b>                     |                      |     |
| AVP                                                            | 2.3E-10 M            | n/a |
| <b>V1B (h) (agonist effect)</b>                                |                      |     |
| Vasopressin                                                    | 1.2E-10 M            | n/a |

**Table S3** Antagonist effect of S-CE-123 at 2.8E-06 M (IC<sub>50</sub> for DAT re-uptake inhibition) in functional cellular assay. The results are expressed as a percent inhibition of control agonist response: 100 – ((measured response / control response) x 100).

| Compound I.D.                           | Client Compound I.D. | Test Concentration | % Inhibition of Control Agonist Response |                 |       |
|-----------------------------------------|----------------------|--------------------|------------------------------------------|-----------------|-------|
|                                         |                      |                    | 1 <sup>st</sup>                          | 2 <sup>nd</sup> | Mean  |
| A1 (h) (antagonist effect)              |                      |                    |                                          |                 |       |
| 100043705-1                             | S-CE-123             | 2.8E-06 M          | 6.3                                      | 14.9            | 10.6  |
| A <sub>2A</sub> (h) (antagonist effect) |                      |                    |                                          |                 |       |
| 100043705-1                             | S-CE-123             | 2.8E-06 M          | 20.0                                     | -0.7            | 9.7   |
| A <sub>2B</sub> (h) (antagonist effect) |                      |                    |                                          |                 |       |
| 100043705-1                             | S-CE-123             | 2.8E-06 M          | -20.5                                    | -3.0            | -11.8 |
| A <sub>3</sub> (h) (antagonist effect)  |                      |                    |                                          |                 |       |
| 100043705-1                             | S-CE-123             | 2.8E-06 M          | -6.0                                     | 2.3             | -1.8  |
| α <sub>1A</sub> (h) (antagonist effect) |                      |                    |                                          |                 |       |
| 100043705-1                             | S-CE-123             | 2.8E-06 M          | 4.3                                      | 1.9             | 3.1   |
| α <sub>1B</sub> (h) (antagonist effect) |                      |                    |                                          |                 |       |
| 100043705-1                             | S-CE-123             | 2.8E-06 M          | -25.8                                    | -4.5            | -15.1 |
| α <sub>1D</sub> (h) (antagonist effect) |                      |                    |                                          |                 |       |
| 100043705-1                             | S-CE-123             | 2.8E-06 M          | -2.4                                     | -2.5            | -2.4  |
| α <sub>2A</sub> (h) (antagonist effect) |                      |                    |                                          |                 |       |
| 100043705-1                             | S-CE-123             | 2.8E-06 M          | -7.6                                     | -9.2            | -8.4  |
| α <sub>2B</sub> (h) (antagonist effect) |                      |                    |                                          |                 |       |
| 100043705-1                             | S-CE-123             | 2.8E-06 M          | 10.4                                     | -27.0           | -8.3  |
| α <sub>2C</sub> (h) (antagonist effect) |                      |                    |                                          |                 |       |
| 100043705-1                             | S-CE-123             | 2.8E-06 M          | -0.6                                     | 1.2             | 0.3   |
| β <sub>1</sub> (h) (antagonist effect)  |                      |                    |                                          |                 |       |
| 100043705-1                             | S-CE-123             | 2.8E-06 M          | 28.0                                     | 8.9             | 18.4  |
| β <sub>2</sub> (h) (antagonist effect)  |                      |                    |                                          |                 |       |
| 100043705-1                             | S-CE-123             | 2.8E-06 M          | -10.2                                    | 7.9             | -1.2  |
| β <sub>3</sub> (h) (antagonist effect)  |                      |                    |                                          |                 |       |
| 100043705-1                             | S-CE-123             | 2.8E-06 M          | 22.9                                     | 8.1             | 15.5  |
| AT <sub>1</sub> (h) (antagonist effect) |                      |                    |                                          |                 |       |
| 100043705-1                             | S-CE-123             | 2.8E-06 M          | 6.5                                      | -0.6            | 3.0   |
| APJ (apelin) (h) (antagonist effect)    |                      |                    |                                          |                 |       |
| 100043705-1                             | S-CE-123             | 2.8E-06 M          | -0.9                                     | 13.2            | 6.2   |
| TGR5 (h) (antagonist effect)            |                      |                    |                                          |                 |       |
| 100043705-1                             | S-CE-123             | 2.8E-06 M          | -1.7                                     | 1.0             | -0.3  |
| BB <sub>1</sub> (h) (antagonist effect) |                      |                    |                                          |                 |       |
| 100043705-1                             | S-CE-123             | 2.8E-06 M          | -14.8                                    | -6.2            | -10.5 |
| BB <sub>2</sub> (h) (antagonist effect) |                      |                    |                                          |                 |       |
| 100043705-1                             | S-CE-123             | 2.8E-06 M          | -29.2                                    | -17.3           | -23.2 |
| BB <sub>3</sub> (h) (antagonist effect) |                      |                    |                                          |                 |       |
| 100043705-1                             | S-CE-123             | 2.8E-06 M          | 3.2                                      | 9.2             | 6.2   |
| B <sub>1</sub> (h) (antagonist effect)  |                      |                    |                                          |                 |       |
| 100043705-1                             | S-CE-123             | 2.8E-06 M          | -2.8                                     | -18.1           | -10.4 |
| B <sub>2</sub> (h) (antagonist effect)  |                      |                    |                                          |                 |       |
| 100043705-1                             | S-CE-123             | 2.8E-06 M          | -23.2                                    | -41.0           | -32.1 |
| CGRP (h) (antagonist effect)            |                      |                    |                                          |                 |       |
| 100043705-1                             | S-CE-123             | 2.8E-06 M          | -37.7                                    | 0.2             | -18.8 |
| CT (Calcitonin) (h) (antagonist effect) |                      |                    |                                          |                 |       |
| 100043705-1                             | S-CE-123             | 2.8E-06 M          | -36.5                                    | -6.9            | -21.7 |
| CaS (h) (antagonist effect)             |                      |                    |                                          |                 |       |
| 100043705-1                             | S-CE-123             | 2.8E-06 M          | -7.9                                     | -4.9            | -6.4  |
| CB <sub>1</sub> (h) (antagonist effect) |                      |                    |                                          |                 |       |
| 100043705-1                             | S-CE-123             | 2.8E-06 M          | -0.3                                     | -3.9            | -2.1  |
| CB <sub>2</sub> (h) (antagonist effect) |                      |                    |                                          |                 |       |
| 100043705-1                             | S-CE-123             | 2.8E-06 M          | 8.6                                      | 8.6             | 8.6   |
| CCR1 (h) (antagonist effect)            |                      |                    |                                          |                 |       |
| 100043705-1                             | S-CE-123             | 2.8E-06 M          | -3.7                                     | 0.7             | -1.5  |
| CCR2 (h) (antagonist effect)            |                      |                    |                                          |                 |       |
| 100043705-1                             | S-CE-123             | 2.8E-06 M          | 3.1                                      | 1.0             | 2.0   |

| Compound I.D.                                                    | Client Compound I.D. | Test Concentration | % Inhibition of Control Agonist Response |                 |       |
|------------------------------------------------------------------|----------------------|--------------------|------------------------------------------|-----------------|-------|
|                                                                  |                      |                    | 1 <sup>st</sup>                          | 2 <sup>nd</sup> | Mean  |
| <b>CCR3 (h) (antagonist effect)</b>                              |                      |                    |                                          |                 |       |
| 100043705-1                                                      | S-CE-123             | 2.8E-06 M          | -11.7                                    | -9.6            | -10.7 |
| <b>CCR4 (h) (antagonist effect)</b>                              |                      |                    |                                          |                 |       |
| 100043705-1                                                      | S-CE-123             | 2.8E-06 M          | -5.5                                     | -6.1            | -5.8  |
| <b>CCR5 (antagonist effect)</b>                                  |                      |                    |                                          |                 |       |
| 100043705-1                                                      | S-CE-123             | 2.8E-06 M          | 18.7                                     | 34.7            | 26.7  |
| <b>CCR6 (h) (antagonist effect)</b>                              |                      |                    |                                          |                 |       |
| 100043705-1                                                      | S-CE-123             | 2.8E-06 M          | -33.1                                    | -20.3           | -26.7 |
| <b>CCR7 (h) (antagonist effect)</b>                              |                      |                    |                                          |                 |       |
| 100043705-1                                                      | S-CE-123             | 2.8E-06 M          | -4.0                                     | 9.6             | 2.8   |
| <b>CCR8 (h) (antagonist effect)</b>                              |                      |                    |                                          |                 |       |
| 100043705-1                                                      | S-CE-123             | 2.8E-06 M          | -20.5                                    | -19.2           | -19.9 |
| <b>CCR10 (h) (antagonist effect)</b>                             |                      |                    |                                          |                 |       |
| 100043705-1                                                      | S-CE-123             | 2.8E-06 M          | -14.8                                    | 0.9             | -6.9  |
| <b>CX3CR1 (h) (antagonist effect)</b>                            |                      |                    |                                          |                 |       |
| 100043705-1                                                      | S-CE-123             | 2.8E-06 M          | -17.2                                    | -14.5           | -15.8 |
| <b>CXCR1 (h) (antagonist effect)</b>                             |                      |                    |                                          |                 |       |
| 100043705-1                                                      | S-CE-123             | 2.8E-06 M          | -6.6                                     | -19.5           | -13.0 |
| <b>CXCR2 (h) (antagonist effect)</b>                             |                      |                    |                                          |                 |       |
| 100043705-1                                                      | S-CE-123             | 2.8E-06 M          | -0.2                                     | 7.9             | 3.8   |
| <b>CXCR3 (h) (antagonist effect)</b>                             |                      |                    |                                          |                 |       |
| 100043705-1                                                      | S-CE-123             | 2.8E-06 M          | -9.4                                     | -6.1            | -7.8  |
| <b>CXCR4 (h) (antagonist effect)</b>                             |                      |                    |                                          |                 |       |
| 100043705-1                                                      | S-CE-123             | 2.8E-06 M          | -62.8                                    | -18.6           | -40.7 |
| <b>CXCR5 (h) (antagonist effect)</b>                             |                      |                    |                                          |                 |       |
| 100043705-1                                                      | S-CE-123             | 2.8E-06 M          | -0.8                                     | -3.0            | -1.9  |
| <b>CXCR6 (h) (antagonist effect)</b>                             |                      |                    |                                          |                 |       |
| 100043705-1                                                      | S-CE-123             | 2.8E-06 M          | -10.8                                    | -4.4            | -7.6  |
| <b>CCK<sub>1</sub> (CCK<sub>A</sub>) (h) (antagonist effect)</b> |                      |                    |                                          |                 |       |
| 100043705-1                                                      | S-CE-123             | 2.8E-06 M          | 28.8                                     | 7.7             | 18.2  |
| <b>CCK<sub>2</sub> (CCK<sub>B</sub>) (h) (antagonist effect)</b> |                      |                    |                                          |                 |       |
| 100043705-1                                                      | S-CE-123             | 2.8E-06 M          | -19.7                                    | 5.9             | -6.9  |
| <b>C3aR (h) (antagonist effect)</b>                              |                      |                    |                                          |                 |       |
| 100043705-1                                                      | S-CE-123             | 2.8E-06 M          | 2.3                                      | 20.5            | 11.4  |
| <b>ChemR23 (h) (antagonist effect)</b>                           |                      |                    |                                          |                 |       |
| 100043705-1                                                      | S-CE-123             | 2.8E-06 M          | -5.3                                     | 2.0             | -1.6  |
| <b>CRF<sub>1</sub> (h) (antagonist effect)</b>                   |                      |                    |                                          |                 |       |
| 100043705-1                                                      | S-CE-123             | 2.8E-06 M          | -13.8                                    | -19.9           | -16.9 |
| <b>CRF<sub>2</sub> (h) (antagonist effect)</b>                   |                      |                    |                                          |                 |       |
| 100043705-1                                                      | S-CE-123             | 2.8E-06 M          | 5.7                                      | 36.6            | 21.1  |
| <b>XCR1 / GPR5 (h) (antagonist effect)</b>                       |                      |                    |                                          |                 |       |
| 100043705-1                                                      | S-CE-123             | 2.8E-06 M          | -15.3                                    | -3.1            | -9.2  |
| <b>D<sub>1</sub> (h) (antagonist effect)</b>                     |                      |                    |                                          |                 |       |
| 100043705-1                                                      | S-CE-123             | 2.8E-06 M          | -15.8                                    | 4.6             | -5.6  |
| <b>D<sub>2S</sub> (h) (antagonist effect)</b>                    |                      |                    |                                          |                 |       |
| 100043705-1                                                      | S-CE-123             | 2.8E-06 M          | 23.8                                     | 12.5            | 18.1  |
| <b>D<sub>3</sub> (h) (antagonist effect)</b>                     |                      |                    |                                          |                 |       |
| 100043705-1                                                      | S-CE-123             | 2.8E-06 M          | 7.1                                      | -10.9           | -1.9  |
| <b>D<sub>4.4</sub> (h) (antagonist effect)</b>                   |                      |                    |                                          |                 |       |
| 100043705-1                                                      | S-CE-123             | 2.8E-06 M          | -9.6                                     | -6.1            | -7.9  |
| <b>D<sub>5</sub> (h) (antagonist effect)</b>                     |                      |                    |                                          |                 |       |
| 100043705-1                                                      | S-CE-123             | 2.8E-06 M          | 11.0                                     | -32.6           | -10.8 |
| <b>ET<sub>A</sub> (h) (antagonist effect)</b>                    |                      |                    |                                          |                 |       |
| 100043705-1                                                      | S-CE-123             | 2.8E-06 M          | -3.3                                     | 2.4             | -0.5  |
| <b>ET<sub>B</sub> (h) (antagonist effect)</b>                    |                      |                    |                                          |                 |       |
| 100043705-1                                                      | S-CE-123             | 2.8E-06 M          | -4.6                                     | 7.6             | 1.5   |



| Compound I.D.                                                      | Client Compound I.D. | Test Concentration | % Inhibition of Control Agonist Response |                 |       |
|--------------------------------------------------------------------|----------------------|--------------------|------------------------------------------|-----------------|-------|
|                                                                    |                      |                    | 1 <sup>st</sup>                          | 2 <sup>nd</sup> | Mean  |
| <b>FFA1 (h) (GPR40) (antagonist effect)</b>                        |                      |                    |                                          |                 |       |
| 100043705-1                                                        | S-CE-123             | 2.8E-06 M          | -1.5                                     | -4.1            | -2.8  |
| <b>FFA2 (h) (GPR43) (antagonist effect)</b>                        |                      |                    |                                          |                 |       |
| 100043705-1                                                        | S-CE-123             | 2.8E-06 M          | 1.2                                      | 4.6             | 2.9   |
| <b>FFA3 (h) (GPR41) (antagonist effect)</b>                        |                      |                    |                                          |                 |       |
| 100043705-1                                                        | S-CE-123             | 2.8E-06 M          | -0.9                                     | -1.8            | -1.4  |
| <b>FFA4 (GPR120) (h) (antagonist effect)</b>                       |                      |                    |                                          |                 |       |
| 100043705-1                                                        | S-CE-123             | 2.8E-06 M          | -12.9                                    | -15.9           | -14.4 |
| <b>GnRH (h) (antagonist effect)</b>                                |                      |                    |                                          |                 |       |
| 100043705-1                                                        | S-CE-123             | 2.8E-06 M          | 4.4                                      | 3.4             | 3.9   |
| <b>GPR39 (h) (antagonist effect)</b>                               |                      |                    |                                          |                 |       |
| 100043705-1                                                        | S-CE-123             | 2.8E-06 M          | 8.6                                      | -5.3            | 1.6   |
| <b>OXGR1 GPR99 (h) (antagonist effect)</b>                         |                      |                    |                                          |                 |       |
| 100043705-1                                                        | S-CE-123             | 2.8E-06 M          | -7.4                                     | -12.9           | -10.2 |
| <b>GPR103/QRFP (h) (antagonist effect)</b>                         |                      |                    |                                          |                 |       |
| 100043705-1                                                        | S-CE-123             | 2.8E-06 M          | -10.3                                    | -7.4            | -8.8  |
| <b>GPR109A (h) (antagonist effect)</b>                             |                      |                    |                                          |                 |       |
| 100043705-1                                                        | S-CE-123             | 2.8E-06 M          | -13.5                                    | -9.8            | -11.6 |
| <b>GPR119 (antagonist effect)</b>                                  |                      |                    |                                          |                 |       |
| 100043705-1                                                        | S-CE-123             | 2.8E-06 M          | -9.8                                     | -1.8            | -5.8  |
| <b>FPR1 (h) (antagonist effect)</b>                                |                      |                    |                                          |                 |       |
| 100043705-1                                                        | S-CE-123             | 2.8E-06 M          | 3.3                                      | -0.1            | 1.6   |
| <b>GABAB1b beta (h) (antagonist effect)</b>                        |                      |                    |                                          |                 |       |
| 100043705-1                                                        | S-CE-123             | 2.8E-06 M          | 1.1                                      | -22.3           | -10.6 |
| <b>GAL1 (h) (antagonist effect)</b>                                |                      |                    |                                          |                 |       |
| 100043705-1                                                        | S-CE-123             | 2.8E-06 M          | 0.8                                      | 3.9             | 2.3   |
| <b>GAL<sub>2</sub> (h) (antagonist effect)</b>                     |                      |                    |                                          |                 |       |
| 100043705-1                                                        | S-CE-123             | 2.8E-06 M          | -9.0                                     | -0.5            | -4.8  |
| <b>GIP (h) (antagonist effect)</b>                                 |                      |                    |                                          |                 |       |
| 100043705-1                                                        | S-CE-123             | 2.8E-06 M          | -6.2                                     | -7.0            | -6.6  |
| <b>GLP-1 (antagonist effect)</b>                                   |                      |                    |                                          |                 |       |
| 100043705-1                                                        | S-CE-123             | 2.8E-06 M          | -27.8                                    | -37.0           | -32.4 |
| <b>secretin (h) (antagonist effect)</b>                            |                      |                    |                                          |                 |       |
| 100043705-1                                                        | S-CE-123             | 2.8E-06 M          | 5.7                                      | 29.6            | 17.6  |
| <b>TSH (h) (antagonist effect)</b>                                 |                      |                    |                                          |                 |       |
| 100043705-1                                                        | S-CE-123             | 2.8E-06 M          | 8.9                                      | -21.2           | -6.1  |
| <b>GHRH (h) (antagonist effect)</b>                                |                      |                    |                                          |                 |       |
| 100043705-1                                                        | S-CE-123             | 2.8E-06 M          | 28.8                                     | -5.4            | 11.7  |
| <b>Ghrelin / GHSR-1a (h) (antagonist effect)</b>                   |                      |                    |                                          |                 |       |
| 100043705-1                                                        | S-CE-123             | 2.8E-06 M          | -14.6                                    | -8.7            | -11.7 |
| <b>H<sub>1</sub> (h) (antagonist effect)</b>                       |                      |                    |                                          |                 |       |
| 100043705-1                                                        | S-CE-123             | 2.8E-06 M          | -1.0                                     | -2.8            | -1.9  |
| <b>H<sub>2</sub> (h) (antagonist effect)</b>                       |                      |                    |                                          |                 |       |
| 100043705-1                                                        | S-CE-123             | 2.8E-06 M          | -2.7                                     | -2.0            | -2.4  |
| <b>H<sub>3</sub> (h) (antagonist effect)</b>                       |                      |                    |                                          |                 |       |
| 100043705-1                                                        | S-CE-123             | 2.8E-06 M          | -1.4                                     | 0.8             | -0.3  |
| <b>H<sub>4</sub> (h) (antagonist effect)</b>                       |                      |                    |                                          |                 |       |
| 100043705-1                                                        | S-CE-123             | 2.8E-06 M          | 4.4                                      | 2.4             | 3.4   |
| <b>KISS1 / GPR54 (h) (antagonist effect)</b>                       |                      |                    |                                          |                 |       |
| 100043705-1                                                        | S-CE-123             | 2.8E-06 M          | -3.5                                     | -2.0            | -2.8  |
| <b>BLT<sub>1</sub> (LTB<sub>4</sub>) (h) (antagonist effect)</b>   |                      |                    |                                          |                 |       |
| 100043705-1                                                        | S-CE-123             | 2.8E-06 M          | -4.9                                     | -4.6            | -4.7  |
| <b>CysLT<sub>1</sub> (LTD<sub>4</sub>) (h) (antagonist effect)</b> |                      |                    |                                          |                 |       |
| 100043705-1                                                        | S-CE-123             | 2.8E-06 M          | -9.2                                     | -16.7           | -12.9 |
| <b>CysLT<sub>2</sub> (LTC<sub>4</sub>) (h) (antagonist effect)</b> |                      |                    |                                          |                 |       |
| 100043705-1                                                        | S-CE-123             | 2.8E-06 M          | 4.2                                      | 4.8             | 4.5   |

| Compound I.D.                                                   | Client Compound I.D. | Test Concentration | % Inhibition of Control Agonist Response |                 |       |
|-----------------------------------------------------------------|----------------------|--------------------|------------------------------------------|-----------------|-------|
|                                                                 |                      |                    | 1 <sup>st</sup>                          | 2 <sup>nd</sup> | Mean  |
| <b>LPA1(h) (antagonist effect)</b>                              |                      |                    |                                          |                 |       |
| 100043705-1                                                     | S-CE-123             | 2.8E-06 M          | -0.4                                     | 9.2             | 4.4   |
| <b>LPA<sub>2</sub> (h) (antagonist effect)</b>                  |                      |                    |                                          |                 |       |
| 100043705-1                                                     | S-CE-123             | 2.8E-06 M          | -12.7                                    | -9.1            | -10.9 |
| <b>LPA<sub>3</sub> (h) (antagonist effect)</b>                  |                      |                    |                                          |                 |       |
| 100043705-1                                                     | S-CE-123             | 2.8E-06 M          | -22.3                                    | -46.4           | -34.4 |
| <b>S<sub>1</sub>P<sub>1</sub> (h) (antagonist effect)</b>       |                      |                    |                                          |                 |       |
| 100043705-1                                                     | S-CE-123             | 2.8E-06 M          | 5.0                                      | 6.7             | 5.9   |
| <b>S<sub>1</sub>P<sub>2</sub> (h) (antagonist effect)</b>       |                      |                    |                                          |                 |       |
| 100043705-1                                                     | S-CE-123             | 2.8E-06 M          | -10.4                                    | -0.1            | -5.2  |
| <b>S<sub>1</sub>P<sub>3</sub> (h) (antagonist effect)</b>       |                      |                    |                                          |                 |       |
| 100043705-1                                                     | S-CE-123             | 2.8E-06 M          | 13.9                                     | 10.5            | 12.2  |
| <b>S1P4 (h) (antagonist effect)</b>                             |                      |                    |                                          |                 |       |
| 100043705-1                                                     | S-CE-123             | 2.8E-06 M          | -14.2                                    | -14.9           | -14.6 |
| <b>S1P5 (h) (antagonist effect)</b>                             |                      |                    |                                          |                 |       |
| 100043705-1                                                     | S-CE-123             | 2.8E-06 M          | 10.1                                     | -2.8            | 3.7   |
| <b>MCH<sub>1</sub> (h) (antagonist effect)</b>                  |                      |                    |                                          |                 |       |
| 100043705-1                                                     | S-CE-123             | 2.8E-06 M          | -1.7                                     | -0.2            | -0.9  |
| <b>MCH<sub>2</sub> (h) (antagonist effect)</b>                  |                      |                    |                                          |                 |       |
| 100043705-1                                                     | S-CE-123             | 2.8E-06 M          | 1.8                                      | 4.4             | 3.1   |
| <b>MC<sub>1</sub> (antagonist effect)</b>                       |                      |                    |                                          |                 |       |
| 100043705-1                                                     | S-CE-123             | 2.8E-06 M          | -27.7                                    | -24.3           | -26.0 |
| <b>MC<sub>2</sub> (h) (antagonist effect)</b>                   |                      |                    |                                          |                 |       |
| 100043705-1                                                     | S-CE-123             | 2.8E-06 M          | -0.1                                     | 6.2             | 3.1   |
| <b>MC<sub>3</sub> (h) (antagonist effect)</b>                   |                      |                    |                                          |                 |       |
| 100043705-1                                                     | S-CE-123             | 2.8E-06 M          | -25.9                                    | 10.3            | -7.8  |
| <b>MC<sub>4</sub> (h) (antagonist effect)</b>                   |                      |                    |                                          |                 |       |
| 100043705-1                                                     | S-CE-123             | 2.8E-06 M          | -11.0                                    | 15.7            | 2.3   |
| <b>MC<sub>5</sub> (h) (antagonist effect)</b>                   |                      |                    |                                          |                 |       |
| 100043705-1                                                     | S-CE-123             | 2.8E-06 M          | 5.8                                      | -23.6           | -8.9  |
| <b>MT<sub>1</sub> (ML<sub>1A</sub>) (h) (antagonist effect)</b> |                      |                    |                                          |                 |       |
| 100043705-1                                                     | S-CE-123             | 2.8E-06 M          | 7.6                                      | 7.6             | 7.6   |
| <b>MT<sub>2</sub> (ML<sub>1B</sub>) (h) (antagonist effect)</b> |                      |                    |                                          |                 |       |
| 100043705-1                                                     | S-CE-123             | 2.8E-06 M          | 2.3                                      | 10.2            | 6.2   |
| <b>motilin (h) (antagonist effect)</b>                          |                      |                    |                                          |                 |       |
| 100043705-1                                                     | S-CE-123             | 2.8E-06 M          | -9.5                                     | -0.9            | -5.2  |
| <b>M<sub>1</sub> (h) (antagonist effect)</b>                    |                      |                    |                                          |                 |       |
| 100043705-1                                                     | S-CE-123             | 2.8E-06 M          | 2.0                                      | 3.2             | 2.6   |
| <b>M<sub>2</sub> (h) (antagonist effect)</b>                    |                      |                    |                                          |                 |       |
| 100043705-1                                                     | S-CE-123             | 2.8E-06 M          | -3.4                                     | -15.0           | -9.2  |
| <b>M<sub>3</sub> (h) (antagonist effect)</b>                    |                      |                    |                                          |                 |       |
| 100043705-1                                                     | S-CE-123             | 2.8E-06 M          | 4.1                                      | -2.5            | 0.8   |
| <b>M<sub>4</sub> (h) (antagonist effect)</b>                    |                      |                    |                                          |                 |       |
| 100043705-1                                                     | S-CE-123             | 2.8E-06 M          | -8.8                                     | -8.2            | -8.5  |
| <b>M<sub>5</sub> (h) (antagonist effect)</b>                    |                      |                    |                                          |                 |       |
| 100043705-1                                                     | S-CE-123             | 2.8E-06 M          | -5.2                                     | -6.6            | -5.9  |
| <b>MrgD (h) (antagonist effect)</b>                             |                      |                    |                                          |                 |       |
| 100043705-1                                                     | S-CE-123             | 2.8E-06 M          | 26.9                                     | 33.0            | 30.0  |
| <b>MRGX1 / MRGPRX1 (h) (antagonist effect)</b>                  |                      |                    |                                          |                 |       |
| 100043705-1                                                     | S-CE-123             | 2.8E-06 M          | 6.4                                      | 3.4             | 4.9   |
| <b>MRGX2 / MGRPLX2 (h) (antagonist effect)</b>                  |                      |                    |                                          |                 |       |
| 100043705-1                                                     | S-CE-123             | 2.8E-06 M          | 9.6                                      | 4.5             | 7.1   |
| <b>NPS (h) (antagonist effect)</b>                              |                      |                    |                                          |                 |       |
| 100043705-1                                                     | S-CE-123             | 2.8E-06 M          | -13.9                                    | -14.7           | -14.3 |
| <b>NPBW1 (h) (antagonist effect)</b>                            |                      |                    |                                          |                 |       |
| 100043705-1                                                     | S-CE-123             | 2.8E-06 M          | 0.1                                      | -4.0            | -1.9  |

| Compound I.D.                                                       | Client Compound I.D. | Test Concentration | % Inhibition of Control Agonist Response |                 |       |
|---------------------------------------------------------------------|----------------------|--------------------|------------------------------------------|-----------------|-------|
|                                                                     |                      |                    | 1 <sup>st</sup>                          | 2 <sup>nd</sup> | Mean  |
| <b>NK<sub>1</sub> (h) (antagonist effect)</b>                       |                      |                    |                                          |                 |       |
| 100043705-1                                                         | S-CE-123             | 2.8E-06 M          | -11.5                                    | 1.0             | -5.3  |
| <b>NK<sub>2</sub> (h) (antagonist effect)</b>                       |                      |                    |                                          |                 |       |
| 100043705-1                                                         | S-CE-123             | 2.8E-06 M          | -1.4                                     | -0.2            | -0.8  |
| <b>NK<sub>3</sub> (h) (antagonist effect)</b>                       |                      |                    |                                          |                 |       |
| 100043705-1                                                         | S-CE-123             | 2.8E-06 M          | -10.2                                    | -0.1            | -5.1  |
| <b>NMU1 (h) (antagonist effect)</b>                                 |                      |                    |                                          |                 |       |
| 100043705-1                                                         | S-CE-123             | 2.8E-06 M          | -25.8                                    | -16.8           | -21.3 |
| <b>NMU2 (h) (antagonist effect)</b>                                 |                      |                    |                                          |                 |       |
| 100043705-1                                                         | S-CE-123             | 2.8E-06 M          | -17.1                                    | -18.4           | -17.7 |
| <b>NTS<sub>1</sub> (NT<sub>1</sub>) (h) (antagonist effect)</b>     |                      |                    |                                          |                 |       |
| 100043705-1                                                         | S-CE-123             | 2.8E-06 M          | -19.0                                    | -1.0            | -10.0 |
| <b>NTS<sub>2</sub> (NT<sub>2</sub>) (h) (antagonist effect)</b>     |                      |                    |                                          |                 |       |
| 100043705-1                                                         | S-CE-123             | 2.8E-06 M          | 26.2                                     | 19.6            | 22.9  |
| <b>δ (DOP) (h) (antagonist effect)</b>                              |                      |                    |                                          |                 |       |
| 100043705-1                                                         | S-CE-123             | 2.8E-06 M          | -2.2                                     | -3.3            | -2.8  |
| <b>κ (KOP) (antagonist effect)</b>                                  |                      |                    |                                          |                 |       |
| 100043705-1                                                         | S-CE-123             | 2.8E-06 M          | 12.8                                     | 2.8             | 7.8   |
| <b>μ (MOP) (h) (antagonist effect)</b>                              |                      |                    |                                          |                 |       |
| 100043705-1                                                         | S-CE-123             | 2.8E-06 M          | -2.2                                     | 12.2            | 5.0   |
| <b>NOP (h) (ORL1) (antagonist effect)</b>                           |                      |                    |                                          |                 |       |
| 100043705-1                                                         | S-CE-123             | 2.8E-06 M          | 19.3                                     | 17.6            | 18.4  |
| <b>OX<sub>1</sub> (h) (antagonist effect)</b>                       |                      |                    |                                          |                 |       |
| 100043705-1                                                         | S-CE-123             | 2.8E-06 M          | -16.5                                    | -12.5           | -14.5 |
| <b>OX<sub>2</sub> (h) (antagonist effect)</b>                       |                      |                    |                                          |                 |       |
| 100043705-1                                                         | S-CE-123             | 2.8E-06 M          | 3.7                                      | 4.7             | 4.2   |
| <b>PAF (h) (antagonist effect)</b>                                  |                      |                    |                                          |                 |       |
| 100043705-1                                                         | S-CE-123             | 2.8E-06 M          | -38.5                                    | -39.8           | -39.1 |
| <b>PTH1 (h) (antagonist effect)</b>                                 |                      |                    |                                          |                 |       |
| 100043705-1                                                         | S-CE-123             | 2.8E-06 M          | -11.0                                    | -10.2           | -10.6 |
| <b>PK<sub>1</sub> (h) (antagonist effect)</b>                       |                      |                    |                                          |                 |       |
| 100043705-1                                                         | S-CE-123             | 2.8E-06 M          | 12.9                                     | -7.9            | 2.5   |
| <b>PK<sub>2</sub> (h) (antagonist effect)</b>                       |                      |                    |                                          |                 |       |
| 100043705-1                                                         | S-CE-123             | 2.8E-06 M          | 3.5                                      | 11.1            | 7.3   |
| <b>DP<sub>1</sub> (h) (antagonist effect)</b>                       |                      |                    |                                          |                 |       |
| 100043705-1                                                         | S-CE-123             | 2.8E-06 M          | -9.7                                     | 4.7             | -2.5  |
| <b>EP<sub>1</sub> (h) (antagonist effect)</b>                       |                      |                    |                                          |                 |       |
| 100043705-1                                                         | S-CE-123             | 2.8E-06 M          | -13.9                                    | -9.8            | -11.9 |
| <b>EP<sub>2</sub> (h) (antagonist effect)</b>                       |                      |                    |                                          |                 |       |
| 100043705-1                                                         | S-CE-123             | 2.8E-06 M          | -11.0                                    | 12.3            | 0.7   |
| <b>EP<sub>3</sub> (h) (antagonist effect)</b>                       |                      |                    |                                          |                 |       |
| 100043705-1                                                         | S-CE-123             | 2.8E-06 M          | -33.0                                    | -28.7           | -30.8 |
| <b>EP<sub>4</sub> (h) (antagonist effect)</b>                       |                      |                    |                                          |                 |       |
| 100043705-1                                                         | S-CE-123             | 2.8E-06 M          | -2.8                                     | -0.3            | -1.5  |
| <b>FP (h) (antagonist effect)</b>                                   |                      |                    |                                          |                 |       |
| 100043705-1                                                         | S-CE-123             | 2.8E-06 M          | 7.8                                      | 5.6             | 6.7   |
| <b>IP (PGI<sub>2</sub>) (h) (antagonist effect)</b>                 |                      |                    |                                          |                 |       |
| 100043705-1                                                         | S-CE-123             | 2.8E-06 M          | 23.9                                     | 8.7             | 16.3  |
| <b>TP (TXA<sub>2</sub>/PGH<sub>2</sub>) (h) (antagonist effect)</b> |                      |                    |                                          |                 |       |
| 100043705-1                                                         | S-CE-123             | 2.8E-06 M          | 0.7                                      | 4.3             | 2.5   |
| <b>PAR1 (h) (antagonist effect)</b>                                 |                      |                    |                                          |                 |       |
| 100043705-1                                                         | S-CE-123             | 2.8E-06 M          | 1.3                                      | 3.0             | 2.1   |
| <b>PAR2 (h) (antagonist effect)</b>                                 |                      |                    |                                          |                 |       |
| 100043705-1                                                         | S-CE-123             | 2.8E-06 M          | -17.9                                    | -20.9           | -19.4 |
| <b>P2Y1 (h) (antagonist effect)</b>                                 |                      |                    |                                          |                 |       |
| 100043705-1                                                         | S-CE-123             | 2.8E-06 M          | -6.6                                     | -6.8            | -6.7  |

| Compound I.D.                                                     | Client Compound I.D. | Test Concentration | % Inhibition of Control Agonist Response |                 |       |
|-------------------------------------------------------------------|----------------------|--------------------|------------------------------------------|-----------------|-------|
|                                                                   |                      |                    | 1 <sup>st</sup>                          | 2 <sup>nd</sup> | Mean  |
| <b>P2Y<sub>2</sub> (h) (antagonist effect)</b>                    |                      |                    |                                          |                 |       |
| 100043705-1                                                       | S-CE-123             | 2.8E-06 M          | -29.4                                    | -12.2           | -20.8 |
| <b>P2Y<sub>6</sub> (h) (antagonist effect)</b>                    |                      |                    |                                          |                 |       |
| 100043705-1                                                       | S-CE-123             | 2.8E-06 M          | -3.2                                     | -3.8            | -3.5  |
| <b>P2Y<sub>6</sub> (h) (antagonist effect)</b>                    |                      |                    |                                          |                 |       |
| 100043705-1                                                       | S-CE-123             | 2.8E-06 M          | 5.6                                      | 1.8             | 3.7   |
| <b>P2Y<sub>11</sub> (h) (antagonist effect)</b>                   |                      |                    |                                          |                 |       |
| 100043705-1                                                       | S-CE-123             | 2.8E-06 M          | 2.9                                      | -4.1            | -0.6  |
| <b>PTH2 (h) (antagonist effect)</b>                               |                      |                    |                                          |                 |       |
| 100043705-1                                                       | S-CE-123             | 2.8E-06 M          | -2.4                                     | -1.3            | -1.9  |
| <b>RXFP1 (h) (antagonist effect)</b>                              |                      |                    |                                          |                 |       |
| 100043705-1                                                       | S-CE-123             | 2.8E-06 M          | 21.4                                     | -19.4           | 1.0   |
| <b>5-HT<sub>1A</sub> (h) (antagonist effect)</b>                  |                      |                    |                                          |                 |       |
| 100043705-1                                                       | S-CE-123             | 2.8E-06 M          | -9.6                                     | -6.7            | -8.2  |
| <b>5HT<sub>1B</sub> (h) (antagonist effect)</b>                   |                      |                    |                                          |                 |       |
| 100043705-1                                                       | S-CE-123             | 2.8E-06 M          | -12.7                                    | -9.8            | -11.3 |
| <b>5-HT<sub>1D</sub> (antagonist effect)</b>                      |                      |                    |                                          |                 |       |
| 100043705-1                                                       | S-CE-123             | 2.8E-06 M          | -3.8                                     | 1.9             | -0.9  |
| <b>5-HT<sub>2A</sub> (h) (antagonist effect)</b>                  |                      |                    |                                          |                 |       |
| 100043705-1                                                       | S-CE-123             | 2.8E-06 M          | -9.3                                     | -1.2            | -5.2  |
| <b>5-HT<sub>2B</sub> (h) (antagonist effect)</b>                  |                      |                    |                                          |                 |       |
| 100043705-1                                                       | S-CE-123             | 2.8E-06 M          | 8.7                                      | -0.6            | 4.1   |
| <b>5-HT<sub>2C</sub> (h) (antagonist effect)</b>                  |                      |                    |                                          |                 |       |
| 100043705-1                                                       | S-CE-123             | 2.8E-06 M          | 6.4                                      | -5.5            | 0.4   |
| <b>5-HT<sub>2e</sub> (h) (antagonist effect)</b>                  |                      |                    |                                          |                 |       |
| 100043705-1                                                       | S-CE-123             | 2.8E-06 M          | 34.4                                     | 18.8            | 26.6  |
| <b>5-HT<sub>6</sub> (h) (antagonist effect)</b>                   |                      |                    |                                          |                 |       |
| 100043705-1                                                       | S-CE-123             | 2.8E-06 M          | -12.0                                    | 14.9            | 1.4   |
| <b>5-HT<sub>7</sub> (h) (antagonist effect)</b>                   |                      |                    |                                          |                 |       |
| 100043705-1                                                       | S-CE-123             | 2.8E-06 M          | 2.0                                      | 0.5             | 1.3   |
| <b>sst<sub>1</sub> (h) (antagonist effect)</b>                    |                      |                    |                                          |                 |       |
| 100043705-1                                                       | S-CE-123             | 2.8E-06 M          | -9.9                                     | -3.3            | -6.6  |
| <b>sst<sub>2</sub> (h) (antagonist effect)</b>                    |                      |                    |                                          |                 |       |
| 100043705-1                                                       | S-CE-123             | 2.8E-06 M          | 1.5                                      | -13.1           | -5.8  |
| <b>sst<sub>3</sub> (h) (antagonist effect)</b>                    |                      |                    |                                          |                 |       |
| 100043705-1                                                       | S-CE-123             | 2.8E-06 M          | -4.5                                     | -6.3            | -5.4  |
| <b>sst<sub>4</sub> (h) (antagonist effect)</b>                    |                      |                    |                                          |                 |       |
| 100043705-1                                                       | S-CE-123             | 2.8E-06 M          | 16.0                                     | 2.4             | 9.2   |
| <b>sst<sub>5</sub> (h) (antagonist effect)</b>                    |                      |                    |                                          |                 |       |
| 100043705-1                                                       | S-CE-123             | 2.8E-06 M          | -5.6                                     | 2.7             | -1.4  |
| <b>SUCNR1/GPR91 (h) (antagonist effect)</b>                       |                      |                    |                                          |                 |       |
| 100043705-1                                                       | S-CE-123             | 2.8E-06 M          | -9.9                                     | -6.0            | -7.9  |
| <b>TRH<sub>1</sub> (h) (antagonist effect)</b>                    |                      |                    |                                          |                 |       |
| 100043705-1                                                       | S-CE-123             | 2.8E-06 M          | 3.0                                      | 7.2             | 5.1   |
| <b>UT (h) (antagonist effect)</b>                                 |                      |                    |                                          |                 |       |
| 100043705-1                                                       | S-CE-123             | 2.8E-06 M          | 14.5                                     | 10.7            | 12.6  |
| <b>PAC<sub>1</sub> (PACAP) (h) (antagonist effect)</b>            |                      |                    |                                          |                 |       |
| 100043705-1                                                       | S-CE-123             | 2.8E-06 M          | 20.9                                     | 38.9            | 29.9  |
| <b>VPAC<sub>1</sub> (VIP<sub>1</sub>) (h) (antagonist effect)</b> |                      |                    |                                          |                 |       |
| 100043705-1                                                       | S-CE-123             | 2.8E-06 M          | 19.4                                     | 8.5             | 13.9  |
| <b>Y4 (h) (antagonist effect)</b>                                 |                      |                    |                                          |                 |       |
| 100043705-1                                                       | S-CE-123             | 2.8E-06 M          | -10.2                                    | -4.2            | -7.2  |
| <b>V<sub>1a</sub> (h) (antagonist effect)</b>                     |                      |                    |                                          |                 |       |
| 100043705-1                                                       | S-CE-123             | 2.8E-06 M          | -19.2                                    | -16.1           | -17.6 |
| <b>V<sub>1B</sub> (h) (antagonist effect)</b>                     |                      |                    |                                          |                 |       |
| 100043705-1                                                       | S-CE-123             | 2.8E-06 M          | -4.6                                     | -7.1            | -5.9  |
| <b>V<sub>2</sub> (h) (antagonist effect)</b>                      |                      |                    |                                          |                 |       |
| 100043705-1                                                       | S-CE-123             | 2.8E-06 M          | 25.0                                     | 15.1            | 20.1  |

**Table S4** Reference compounds for antagonist effect.

| Compound I.D.                                  | IC <sub>50</sub> (M) | K <sub>d</sub> (M) | nH  |
|------------------------------------------------|----------------------|--------------------|-----|
| <b>A1 (h) (antagonist effect)</b>              |                      |                    |     |
| DPCPX                                          | 5.1E-09 M            | 1.2E-09 M          | n/a |
| <b>A<sub>2A</sub> (h) (antagonist effect)</b>  |                      |                    |     |
| ZM 241385                                      | 6.9E-10 M            | 7.4E-11 M          | n/a |
| <b>A<sub>2B</sub> (h) (antagonist effect)</b>  |                      |                    |     |
| XAC                                            | 2.2E-07 M            | 2.7E-08 M          | n/a |
| <b>A<sub>3</sub> (h) (antagonist effect)</b>   |                      |                    |     |
| MRS 1220                                       | 6.4E-09 M            | 3.0E-10 M          | n/a |
| <b>α<sub>1A</sub> (h) (antagonist effect)</b>  |                      |                    |     |
| WB 4101                                        | 1.7E-09 M            | 2.3E-10 M          | n/a |
| <b>α<sub>1B</sub> (h) (antagonist effect)</b>  |                      |                    |     |
| L765314                                        | 8.5E-09 M            | 9.1E-10 M          | n/a |
| <b>α<sub>1D</sub> (h) (antagonist effect)</b>  |                      |                    |     |
| WB4101                                         | 2.9E-09 M            | 8.3E-10 M          | n/a |
| <b>α<sub>2A</sub> (h) (antagonist effect)</b>  |                      |                    |     |
| RX 821002                                      | 1.1E-08 M            | 3.6E-09 M          | n/a |
| <b>α<sub>2B</sub> (h) (antagonist effect)</b>  |                      |                    |     |
| yohimbine                                      | 4.0E-07 M            | 5.2E-08 M          | n/a |
| <b>α<sub>2C</sub> (h) (antagonist effect)</b>  |                      |                    |     |
| rauwolscine                                    | 3.6E-08 M            | 1.7E-09 M          | n/a |
| <b>β<sub>1</sub> (h) (antagonist effect)</b>   |                      |                    |     |
| atenolol                                       | 2.3E-07 M            | 2.8E-08 M          | n/a |
| <b>β<sub>2</sub> (h) (antagonist effect)</b>   |                      |                    |     |
| ICI 118551                                     | 3.0E-09 M            | 2.8E-10 M          | n/a |
| <b>β<sub>3</sub> (h) (antagonist effect)</b>   |                      |                    |     |
| cyanopindolol                                  | 4.0E-07 M            | 1.4E-07 M          | n/a |
| <b>AT<sub>1</sub> (h) (antagonist effect)</b>  |                      |                    |     |
| saralasin                                      | 1.0E-09 M            | 8.5E-11 M          | n/a |
| <b>BB<sub>1</sub> (h) (antagonist effect)</b>  |                      |                    |     |
| PD 168368                                      | 2.2E-07 M            | 5.3E-09 M          | n/a |
| <b>BB<sub>2</sub> (h) (antagonist effect)</b>  |                      |                    |     |
| ICI 216,140                                    | 5.3E-07 M            | 6.9E-08 M          | n/a |
| <b>B<sub>1</sub> (h) (antagonist effect)</b>   |                      |                    |     |
| LysdesArg <sup>7</sup> [Leu <sup>9</sup> ]-BK  | 1.9E-10 M            | 4.0E-11 M          | n/a |
| <b>B<sub>2</sub> (h) (antagonist effect)</b>   |                      |                    |     |
| HOE 140                                        | 3.1E-08 M            | 3.6E-09 M          | n/a |
| <b>CGRP (h) (antagonist effect)</b>            |                      |                    |     |
| hCGRPα (8-37)                                  | 4.5E-08 M            | 7.7E-09 M          | n/a |
| <b>CT (Calcitonin) (h) (antagonist effect)</b> |                      |                    |     |
| salmon calcitonin 8-32                         | 6.9E-08 M            | 4.1E-09 M          | n/a |
| <b>CB<sub>1</sub> (h) (antagonist effect)</b>  |                      |                    |     |
| AM 281                                         | 1.0E-08 M            | 1.1E-09 M          | n/a |
| <b>CB<sub>2</sub> (h) (antagonist effect)</b>  |                      |                    |     |
| AM 630                                         | 7.4E-07 M            | 4.9E-08 M          | n/a |
| <b>CCR1 (h) (antagonist effect)</b>            |                      |                    |     |
| J113863                                        | 6.2E-09 M            | 1.0E-09 M          | n/a |
| <b>CCR2 (h) (antagonist effect)</b>            |                      |                    |     |
| MIP-II                                         | 2.6E-07 M            | 2.1E-08 M          | n/a |
| <b>CCR3 (h) (antagonist effect)</b>            |                      |                    |     |
| J113863                                        | 3.4E-09 M            | 7.6E-10 M          | n/a |

| Compound I.D.                                                      | IC <sub>50</sub> (M) | K <sub>d</sub> (M) | nH  |
|--------------------------------------------------------------------|----------------------|--------------------|-----|
| <b>CXCR2 (h) (antagonist effect)</b>                               |                      |                    |     |
| SB225002                                                           | 1.7E-06 M            | 1.6E-07 M          | n/a |
| <b>CXCR4 (h) (antagonist effect)</b>                               |                      |                    |     |
| MIP II                                                             | 6.5E-08 M            | 1.6E-09 M          | n/a |
| <b>CCK<sub>1</sub> (CCK<sub>A</sub>) (h) (antagonist effect)</b>   |                      |                    |     |
| devazepide                                                         | 1.1E-10 M            | 1.2E-11 M          | n/a |
| <b>CCK<sub>2</sub> (CCK<sub>B</sub>) (h) (antagonist effect)</b>   |                      |                    |     |
| YM022                                                              | 6.0E-10 M            | 7.3E-11 M          | n/a |
| <b>C3aR (h) (antagonist effect)</b>                                |                      |                    |     |
| SB290157                                                           | 2.4E-06 M            | 8.1E-08 M          | n/a |
| <b>CRF<sub>1</sub> (h) (antagonist effect)</b>                     |                      |                    |     |
| antalarmin                                                         | 9.6E-08 M            | 3.4E-08 M          | n/a |
| <b>CRF<sub>2</sub> (h) (antagonist effect)</b>                     |                      |                    |     |
| astressin                                                          | 4.9E-08 M            | 4.8E-09 M          | n/a |
| <b>D<sub>1</sub> (h) (antagonist effect)</b>                       |                      |                    |     |
| SCH 23390                                                          | 2.5E-09 M            | 4.1E-10 M          | n/a |
| <b>D<sub>2S</sub> (h) (antagonist effect)</b>                      |                      |                    |     |
| butaclamol                                                         | 8.3E-09 M            | 5.4E-10 M          | n/a |
| <b>D<sub>3</sub> (h) (antagonist effect)</b>                       |                      |                    |     |
| (+)-butaclamol                                                     | 1.2E-08 M            | 1.5E-09 M          | n/a |
| <b>D<sub>4A</sub> (h) (antagonist effect)</b>                      |                      |                    |     |
| clozapine                                                          | 1.2E-07 M            | 1.5E-08 M          | n/a |
| <b>D<sub>5</sub> (h) (antagonist effect)</b>                       |                      |                    |     |
| SCH 23390                                                          | 1.3E-09 M            | 3.9E-10 M          | n/a |
| <b>ET<sub>A</sub> (h) (antagonist effect)</b>                      |                      |                    |     |
| BQ-123                                                             | 3.3E-10 M            | 3.0E-11 M          | n/a |
| <b>ET<sub>B</sub> (h) (antagonist effect)</b>                      |                      |                    |     |
| BQ-788                                                             | 3.6E-08 M            | 9.6E-09 M          | n/a |
| <b>GnRH (h) (antagonist effect)</b>                                |                      |                    |     |
| Cetrorelix                                                         | 3.0E-09 M            | 4.8E-10 M          | n/a |
| <b>GABAB1b beta (h) (antagonist effect)</b>                        |                      |                    |     |
| CGP55845A                                                          | 2.5E-09 M            | 2.6E-10 M          | n/a |
| <b>GLP-1 (antagonist effect)</b>                                   |                      |                    |     |
| exendin-3(9-39)                                                    | 3.1E-09 M            | 5.9E-10 M          | n/a |
| <b>GHRH (h) (antagonist effect)</b>                                |                      |                    |     |
| [N-Acetyl-Tyr <sup>1</sup> ,D-Arg <sup>3</sup> ]-GHRF              | 2.1E-08 M            | 4.6E-09 M          | n/a |
| <b>Ghrelin / GHSR-1a (h) (antagonist effect)</b>                   |                      |                    |     |
| Substance P                                                        | 3.8E-08 M            | 7.1E-09 M          | n/a |
| <b>H<sub>1</sub> (h) (antagonist effect)</b>                       |                      |                    |     |
| pyrilamine                                                         | 6.7E-09 M            | 1.6E-09 M          | n/a |
| <b>H<sub>2</sub> (h) (antagonist effect)</b>                       |                      |                    |     |
| cimetidine                                                         | 5.9E-06 M            | 9.1E-07 M          | n/a |
| <b>H<sub>3</sub> (h) (antagonist effect)</b>                       |                      |                    |     |
| thiopramide                                                        | 2.1E-06 M            | 6.1E-08 M          | n/a |
| <b>H<sub>4</sub> (h) (antagonist effect)</b>                       |                      |                    |     |
| JNJ 7777120                                                        | 3.9E-08 M            | 2.3E-09 M          | n/a |
| <b>CysLT<sub>1</sub> (LTD<sub>4</sub>) (h) (antagonist effect)</b> |                      |                    |     |
| MK 571                                                             | 4.2E-10 M            | 9.7E-11 M          | n/a |
| <b>LPA1(h) (antagonist effect)</b>                                 |                      |                    |     |
| KI16425                                                            | 7.6E-08 M            | 6.9E-09 M          | n/a |
| <b>S<sub>1</sub>P<sub>1</sub> (h) (antagonist effect)</b>          |                      |                    |     |
| VPC23019                                                           | 5.1E-08 M            | 1.1E-08 M          | n/a |
| <b>S<sub>1</sub>P<sub>2</sub> (h) (antagonist effect)</b>          |                      |                    |     |
| JTE 013                                                            | 4.8E-09 M            | 1.0E-09 M          | n/a |
| <b>MC<sub>1</sub> (antagonist effect)</b>                          |                      |                    |     |
| AGRP (83-132)                                                      | 2.5E-07 M            | 9.3E-09 M          | n/a |
| <b>MC<sub>2</sub> (h) (antagonist effect)</b>                      |                      |                    |     |
| SHU 9119                                                           | 3.4E-08 M            | 6.4E-10 M          | n/a |

| Compound I.D.                                                       | IC <sub>50</sub> (M) | K <sub>d</sub> (M) | nH  |
|---------------------------------------------------------------------|----------------------|--------------------|-----|
| <b>MC<sub>4</sub> (h) (antagonist effect)</b>                       |                      |                    |     |
| SHU 9119                                                            | 7.3E-10 M            | 7.5E-11 M          | n/a |
| <b>MC<sub>5</sub> (h) (antagonist effect)</b>                       |                      |                    |     |
| AGRP (83-132)                                                       | 1.4E-07 M            | 3.9E-08 M          | n/a |
| <b>MT<sub>1</sub> (ML<sub>1A</sub>) (h) (antagonist effect)</b>     |                      |                    |     |
| luzindole                                                           | 1.8E-06 M            | 1.7E-07 M          | n/a |
| <b>M<sub>1</sub> (h) (antagonist effect)</b>                        |                      |                    |     |
| pirenzepine                                                         | 2.9E-08 M            | 3.4E-09 M          | n/a |
| <b>M<sub>2</sub> (h) (antagonist effect)</b>                        |                      |                    |     |
| methoctramine                                                       | 1.4E-07 M            | 1.6E-08 M          | n/a |
| <b>M<sub>3</sub> (h) (antagonist effect)</b>                        |                      |                    |     |
| 4-DAMP                                                              | 5.2E-09 M            | 4.7E-10 M          | n/a |
| <b>M<sub>4</sub> (h) (antagonist effect)</b>                        |                      |                    |     |
| PD 102807                                                           | 9.3E-08 M            | 8.4E-09 M          | n/a |
| <b>M<sub>5</sub> (h) (antagonist effect)</b>                        |                      |                    |     |
| Atropine                                                            | 2.4E-09 M            | 2.2E-10 M          | n/a |
| <b>NPS (h) (antagonist effect)</b>                                  |                      |                    |     |
| SHA68                                                               | 4.7E-08 M            | 1.3E-09 M          | n/a |
| <b>NK<sub>1</sub> (h) (antagonist effect)</b>                       |                      |                    |     |
| L 733,060                                                           | 1.2E-09 M            | 1.8E-10 M          | n/a |
| <b>NK<sub>2</sub> (h) (antagonist effect)</b>                       |                      |                    |     |
| GR 159897                                                           | 8.4E-10 M            | 1.1E-10 M          | n/a |
| <b>NK<sub>3</sub> (h) (antagonist effect)</b>                       |                      |                    |     |
| SB 222200                                                           | 4.2E-08 M            | 3.8E-09 M          | n/a |
| <b>NTS<sub>1</sub> (NT<sub>1</sub>) (h) (antagonist effect)</b>     |                      |                    |     |
| SR142948                                                            | 2.9E-08 M            | 2.6E-09 M          | n/a |
| <b>NTS<sub>2</sub> (NT<sub>2</sub>) (h) (antagonist effect)</b>     |                      |                    |     |
| neurotensin                                                         | 2.3E-07 M            | 4.6E-08 M          | n/a |
| <b>δ (DOP) (h) (antagonist effect)</b>                              |                      |                    |     |
| Naltriben                                                           | 7.7E-09 M            | 1.1E-09 M          | n/a |
| <b>κ (KOP) (antagonist effect)</b>                                  |                      |                    |     |
| nor-BNI                                                             | 7.8E-10 M            | 1.3E-10 M          | n/a |
| <b>μ (MOP) (h) (antagonist effect)</b>                              |                      |                    |     |
| CTOP                                                                | 7.9E-08 M            | 7.2E-09 M          | n/a |
| <b>NOP (h) (ORL1) (antagonist effect)</b>                           |                      |                    |     |
| UFP-101                                                             | 1.5E-07 M            | 4.0E-08 M          | n/a |
| <b>OX<sub>1</sub> (h) (antagonist effect)</b>                       |                      |                    |     |
| SB 334867                                                           | 5.8E-08 M            | 1.2E-08 M          | n/a |
| <b>OX<sub>2</sub> (h) (antagonist effect)</b>                       |                      |                    |     |
| JNJ 10397049                                                        | 9.5E-08 M            | 1.3E-08 M          | n/a |
| <b>PTH1 (h) (antagonist effect)</b>                                 |                      |                    |     |
| PTHrP (7-34)                                                        | 2.2E-07 M            | 2.8E-08 M          | n/a |
| <b>DP<sub>1</sub> (h) (antagonist effect)</b>                       |                      |                    |     |
| MK0524                                                              | 1.8E-09 M            | 3.5E-10 M          | n/a |
| <b>EP<sub>1</sub> (h) (antagonist effect)</b>                       |                      |                    |     |
| SC 51322                                                            | 2.6E-08 M            | 4.1E-09 M          | n/a |
| <b>EP<sub>2</sub> (h) (antagonist effect)</b>                       |                      |                    |     |
| AH 6809                                                             | 2.7E-06 M            | 8.6E-07 M          | n/a |
| <b>EP<sub>3</sub> (h) (antagonist effect)</b>                       |                      |                    |     |
| L798.106                                                            | 4.4E-10 M            | 7.3E-11 M          | n/a |
| <b>EP<sub>4</sub> (h) (antagonist effect)</b>                       |                      |                    |     |
| GW627368X                                                           | 7.7E-08 M            | 7.3E-09 M          | n/a |
| <b>IP (PGI<sub>2</sub>) (h) (antagonist effect)</b>                 |                      |                    |     |
| CAY10441                                                            | 3.3E-08 M            | 4.6E-09 M          | n/a |
| <b>TP (TXA<sub>2</sub>/PGH<sub>2</sub>) (h) (antagonist effect)</b> |                      |                    |     |
| L 670596                                                            | 1.4E-09 M            | 2.0E-10 M          | n/a |
| <b>PAR1 (h) (antagonist effect)</b>                                 |                      |                    |     |
| SCH 79797                                                           | 1.8E-06 M            | 2.5E-07 M          | n/a |

| Compound ID.                                                                                               | IC <sub>50</sub> (M) | K <sub>d</sub> (M) | nH  |
|------------------------------------------------------------------------------------------------------------|----------------------|--------------------|-----|
| <b>P2Y<sub>1</sub> (h) (antagonist effect)</b>                                                             |                      |                    |     |
| MRS 2500                                                                                                   | 1.9E-09 M            | 4.3E-10 M          | n/a |
| <b>P2Y<sub>2</sub> (h) (antagonist effect)</b>                                                             |                      |                    |     |
| AR-C 118925XX                                                                                              | 3.9E-07 M            | 6.6E-08 M          | n/a |
| <b>5-HT<sub>1A</sub> (h) (antagonist effect)</b>                                                           |                      |                    |     |
| (S)-WAY-100635                                                                                             | 5.2E-09 M            | 1.1E-09 M          | n/a |
| <b>5HT<sub>1B</sub> (h) (antagonist effect)</b>                                                            |                      |                    |     |
| GR55562                                                                                                    | 6.9E-08 M            | 1.1E-08 M          | n/a |
| <b>5-HT<sub>1D</sub> (antagonist effect)</b>                                                               |                      |                    |     |
| methiothepin                                                                                               | 1.7E-07 M            | 1.1E-08 M          | n/a |
| <b>5-HT<sub>2A</sub> (h) (antagonist effect)</b>                                                           |                      |                    |     |
| ketanserin                                                                                                 | 6.5E-09 M            | 1.3E-09 M          | n/a |
| <b>5-HT<sub>2B</sub> (h) (antagonist effect)</b>                                                           |                      |                    |     |
| SB 206553                                                                                                  | 1.9E-08 M            | 2.9E-09 M          | n/a |
| <b>5-HT<sub>2C</sub> (h) (antagonist effect)</b>                                                           |                      |                    |     |
| SB 206553                                                                                                  | 1.3E-08 M            | 2.9E-09 M          | n/a |
| <b>5-HT<sub>2D</sub> (h) (antagonist effect)</b>                                                           |                      |                    |     |
| GR 113808                                                                                                  | 3.8E-10 M            | 5.6E-11 M          | n/a |
| <b>5-HT<sub>6</sub> (h) (antagonist effect)</b>                                                            |                      |                    |     |
| methiothepin                                                                                               | 6.3E-09 M            | 9.8E-10 M          | n/a |
| <b>5-HT<sub>7</sub> (h) (antagonist effect)</b>                                                            |                      |                    |     |
| methiothepin                                                                                               | 1.1E-09 M            | 1.3E-10 M          | n/a |
| <b>PAC<sub>1</sub> (PACAP) (h) (antagonist effect)</b>                                                     |                      |                    |     |
| PACAP <sub>6-38</sub>                                                                                      | 2.1E-08 M            | 7.8E-09 M          | n/a |
| <b>VPAC<sub>1</sub> (VIP<sub>1</sub>) (h) (antagonist effect)</b>                                          |                      |                    |     |
| VIP GRF <sub>9-27</sub>                                                                                    | 9.0E-08 M            | 1.8E-08 M          | n/a |
| <b>V<sub>1a</sub> (h) (antagonist effect)</b>                                                              |                      |                    |     |
| [d(CH <sub>2</sub> ) <sub>2</sub> <sup>1</sup> ,Tyr(Me) <sub>2</sub> ]-AVP                                 | 5.3E-09 M            | 1.8E-10 M          | n/a |
| <b>V<sub>2</sub> (h) (antagonist effect)</b>                                                               |                      |                    |     |
| [adamantaneacetyl <sup>1</sup> ,O-Et-D-Tyr <sup>2</sup> ,Val <sup>4</sup> ,aminobutyryl <sup>6</sup> ]-AVP | 3.0E-08 M            | 9.1E-09 M          | n/a |

## Kinase binding assays

This study was outsourced to DiscoverX (KINOMEScan®, Freemont, CA, USA) and is compliant with the corresponding project BUY004-01-p-00001.

**Table S5** A list of the 450 protein and lipid kinases representative of all major human kinase families tested as potential targets of S-CE-123 at 2.8E-06 M (IC<sub>50</sub> for DAT re-uptake inhibition) *in vitro* binding assay. Results are reported as percent control (% Ctrl), where lower numbers indicate stronger hits in the matrix on the following page(s). %Ctrl calculation: ((test compound signal-positive control signal) / (negative control signal – positive control signal)) x 100.



| Target                        | S-CE-123       | Target              | S-CE-123       | Target                    | S-CE-123       |
|-------------------------------|----------------|---------------------|----------------|---------------------------|----------------|
| Gene Symbol                   | %Ctrl @ 2800nM | Gene Symbol         | %Ctrl @ 2800nM | Gene Symbol               | %Ctrl @ 2800nM |
| AAK1                          | 88             | BRK                 | 96             | CSNK1G2                   | 94             |
| ABL1(E255K)-phosphorylated    | 73             | BRSK1               | 100            | CSNK1G3                   | 98             |
| ABL1(F317I)-nonphosphorylated | 100            | BRSK2               | 100            | CSNK2A1                   | 88             |
| ABL1(F317I)-phosphorylated    | 92             | BTB                 | 100            | CSNK2A2                   | 100            |
| ABL1(F317L)-nonphosphorylated | 100            | BUB1                | 100            | CTK                       | 51             |
| ABL1(F317L)-phosphorylated    | 100            | CAMK1               | 97             | DAPK1                     | 91             |
| ABL1(H396P)-nonphosphorylated | 86             | CAMK1B              | 100            | DAPK2                     | 96             |
| ABL1(H396P)-phosphorylated    | 90             | CAMK1D              | 96             | DAPK3                     | 96             |
| ABL1(M351T)-phosphorylated    | 100            | CAMK1G              | 82             | DCAMKL1                   | 100            |
| ABL1(Q252H)-nonphosphorylated | 66             | CAMK2A              | 93             | DCAMKL2                   | 97             |
| ABL1(Q252H)-phosphorylated    | 84             | CAMK2B              | 87             | DCAMKL3                   | 96             |
| ABL1(T315I)-nonphosphorylated | 100            | CAMK2D              | 88             | DDR1                      | 100            |
| ABL1(T315I)-phosphorylated    | 98             | CAMK2G              | 95             | DDR2                      | 100            |
| ABL1(Y253F)-phosphorylated    | 93             | CAMK4               | 91             | DLK                       | 100            |
| ABL1-nonphosphorylated        | 93             | CAMKK1              | 95             | DMPK                      | 96             |
| ABL1-phosphorylated           | 100            | CAMKK2              | 94             | DMPK2                     | 88             |
| ABL2                          | 99             | CASK                | 82             | DRAK1                     | 95             |
| ACVR1                         | 99             | CDC2L1              | 95             | DRAK2                     | 95             |
| ACVR1B                        | 100            | CDC2L2              | 98             | DYRK1A                    | 96             |
| ACVR2A                        | 100            | CDC2L5              | 98             | DYRK1B                    | 40             |
| ACVR2B                        | 100            | CDK11               | 71             | DYRK2                     | 86             |
| ACVRL1                        | 84             | CDK2                | 94             | EGFR                      | 92             |
| ADCK3                         | 87             | CDK3                | 100            | EGFR(E746-A750del)        | 93             |
| ADCK4                         | 96             | CDK4                | 100            | EGFR(G719C)               | 74             |
| AKT1                          | 99             | CDK4-cyclinD1       | 100            | EGFR(G719S)               | 77             |
| AKT2                          | 87             | CDK4-cyclinD3       | 85             | EGFR(L747-E749del, A750P) | 93             |
| AKT3                          | 99             | CDK5                | 97             | EGFR(L747-S752del, P753S) | 96             |
| ALK                           | 100            | CDK7                | 70             | EGFR(L747-T751del,Sins)   | 57             |
| ALK(C1156Y)                   | 100            | CDK8                | 96             | EGFR(L858R)               | 92             |
| ALK(L1196M)                   | 100            | CDK9                | 92             | EGFR(L858R,T790M)         | 99             |
| AMPK-alpha1                   | 92             | CDKL1               | 100            | EGFR(L861Q)               | 98             |
| AMPK-alpha2                   | 97             | CDKL2               | 89             | EGFR(S752-I759del)        | 66             |
| ANKK1                         | 100            | CDKL3               | 81             | EGFR(T790M)               | 98             |
| ARK5                          | 100            | CDKL5               | 97             | EIF2AK1                   | 100            |
| ASK1                          | 84             | CHEK1               | 89             | EPHA1                     | 96             |
| ASK2                          | 100            | CHEK2               | 78             | EPHA2                     | 73             |
| AURKA                         | 91             | CIT                 | 74             | EPHA3                     | 97             |
| AURKB                         | 78             | CLK1                | 96             | EPHA4                     | 97             |
| AURKC                         | 100            | CLK2                | 93             | EPHA5                     | 86             |
| AXL                           | 96             | CLK3                | 95             | EPHA6                     | 100            |
| BIKE                          | 97             | CLK4                | 100            | EPHA7                     | 96             |
| BLK                           | 90             | CSF1R               | 76             | EPHA8                     | 100            |
| BMPR1A                        | 100            | CSF1R-autoinhibited | 100            | EPHB1                     | 100            |
| BMPR1B                        | 100            | CSK                 | 98             | EPHB2                     | 89             |
| BMPR2                         | 100            | CSNK1A1             | 74             | EPHB3                     | 100            |
| BMX                           | 57             | CSNK1A1L            | 100            | EPHB4                     | 95             |
| BRAF                          | 100            | CSNK1D              | 100            | EPHB6                     | 89             |
| BRAF(V600E)                   | 100            | CSNK1E              | 96             | ERBB2                     | 100            |
|                               |                | CSNK1G1             | 96             | ERBB3                     | 89             |

%Ctrl Legend

|        |        |        |         |      |
|--------|--------|--------|---------|------|
| 0≤x<.1 | .1≤x<1 | 1≤x<10 | 10≤x<35 | x≥35 |
|--------|--------|--------|---------|------|

| Target                | S-CE-123       | Target                       | S-CE-123       | Target      | S-CE-123       |
|-----------------------|----------------|------------------------------|----------------|-------------|----------------|
| Gene Symbol           | %Ctrl @ 2800nM | Gene Symbol                  | %Ctrl @ 2800nM | Gene Symbol | %Ctrl @ 2800nM |
| ERBB4                 | 96             | ICK                          | 91             | MAPKAPK2    | 99             |
| ERK1                  | 91             | IGF1R                        | 94             | MAPKAPK5    | 100            |
| ERK2                  | 95             | IKK-alpha                    | 100            | MARK1       | 93             |
| ERK3                  | 93             | IKK-beta                     | 96             | MARK2       | 100            |
| ERK4                  | 100            | IKK-epsilon                  | 98             | MARK3       | 70             |
| ERK5                  | 91             | INSR                         | 100            | MARK4       | 98             |
| ERK8                  | 100            | INSRR                        | 94             | MAST1       | 94             |
| ERN1                  | 86             | IRAK1                        | 91             | MEK1        | 94             |
| FAK                   | 100            | IRAK3                        | 96             | MEK2        | 93             |
| FER                   | 100            | IRAK4                        | 94             | MEK3        | 86             |
| FES                   | 95             | ITK                          | 100            | MEK4        | 100            |
| FGFR1                 | 100            | JAK1(JH1domain-catalytic)    | 93             | MEK5        | 98             |
| FGFR2                 | 87             | JAK1(JH2domain-pseudokinase) | 92             | MEK6        | 89             |
| FGFR3                 | 91             | JAK2(JH1domain-catalytic)    | 100            | MELK        | 67             |
| FGFR3(G697C)          | 96             | JAK3(JH1domain-catalytic)    | 100            | MERTK       | 63             |
| FGFR4                 | 100            | JNK1                         | 67             | MET         | 99             |
| FGR                   | 100            | JNK2                         | 90             | MET(M1250T) | 99             |
| FLT1                  | 100            | JNK3                         | 74             | MET(Y1235D) | 99             |
| FLT3                  | 96             | KIT                          | 97             | MINK        | 87             |
| FLT3(D835H)           | 58             | KIT(A829P)                   | 98             | MKK7        | 100            |
| FLT3(D835V)           | 100            | KIT(D816H)                   | 100            | MKNK1       | 96             |
| FLT3(D835Y)           | 99             | KIT(D816V)                   | 97             | MKNK2       | 69             |
| FLT3(ITD)             | 100            | KIT(L576P)                   | 99             | MLCK        | 96             |
| FLT3(ITD,D835V)       | 100            | KIT(V559D)                   | 97             | MLK1        | 100            |
| FLT3(ITD,F691L)       | 50             | KIT(V559D,T670I)             | 83             | MLK2        | 96             |
| FLT3(K663Q)           | 96             | KIT(V559D,V654A)             | 100            | MLK3        | 100            |
| FLT3(N841I)           | 91             | KIT-autoinhibited            | 86             | MRCKA       | 95             |
| FLT3(R834Q)           | 90             | LATS1                        | 93             | MRCKB       | 98             |
| FLT3-autoinhibited    | 99             | LATS2                        | 100            | MST1        | 97             |
| FLT4                  | 100            | LCK                          | 100            | MST1R       | 93             |
| FRK                   | 96             | LIMK1                        | 98             | MST2        | 80             |
| FYN                   | 93             | LIMK2                        | 88             | MST3        | 87             |
| GAK                   | 100            | LKB1                         | 100            | MST4        | 100            |
| GCN2(Kin.Dom.2,S808G) | 100            | LOK                          | 95             | MTOR        | 100            |
| GRK1                  | 100            | LRRK2                        | 100            | MUSK        | 100            |
| GRK2                  | 100            | LRRK2(G2019S)                | 96             | MYLK        | 96             |
| GRK3                  | 100            | LTK                          | 93             | MYLK2       | 99             |
| GRK4                  | 73             | LYN                          | 83             | MYLK4       | 89             |
| GRK7                  | 90             | LZK                          | 94             | MYO3A       | 96             |
| GSK3A                 | 99             | MAK                          | 94             | MYO3B       | 52             |
| GSK3B                 | 92             | MAP3K1                       | 85             | NDR1        | 83             |
| HASPIN                | 95             | MAP3K15                      | 84             | NDR2        | 82             |
| HCK                   | 99             | MAP3K2                       | 100            | NEK1        | 90             |
| HIPK1                 | 90             | MAP3K3                       | 86             | NEK10       | 100            |
| HIPK2                 | 100            | MAP3K4                       | 84             | NEK11       | 100            |
| HIPK3                 | 91             | MAP4K2                       | 100            | NEK2        | 96             |
| HIPK4                 | 100            | MAP4K3                       | 100            | NEK3        | 100            |
| HPK1                  | 89             | MAP4K4                       | 100            | NEK4        | 83             |
| HUNK                  | 100            | MAP4K5                       | 95             | NEK5        | 90             |

%Ctrl Legend

|        |        |        |         |      |
|--------|--------|--------|---------|------|
| 0≤x<.1 | .1≤x<1 | 1≤x<10 | 10≤x<35 | x≥35 |
|--------|--------|--------|---------|------|

| Target                | S-CE-123       | Target                        | S-CE-123       | Target                     | S-CE-123       |
|-----------------------|----------------|-------------------------------|----------------|----------------------------|----------------|
| Gene Symbol           | %Ctrl @ 2800nM | Gene Symbol                   | %Ctrl @ 2800nM | Gene Symbol                | %Ctrl @ 2800nM |
| NEK6                  | 100            | PIP5K1A                       | 95             | RSK1(Kin.Dom.2-C-terminal) | 92             |
| NEK7                  | 100            | PIP5K1C                       | 100            | RSK2(Kin.Dom.1-N-terminal) | 100            |
| NEK9                  | 100            | PIP5K2B                       | 100            | RSK2(Kin.Dom.2-C-terminal) | 96             |
| NIK                   | 100            | PIP5K2C                       | 100            | RSK3(Kin.Dom.1-N-terminal) | 100            |
| NIM1                  | 97             | PKAC-alpha                    | 95             | RSK3(Kin.Dom.2-C-terminal) | 87             |
| NLK                   | 97             | PKAC-beta                     | 100            | RSK4(Kin.Dom.1-N-terminal) | 100            |
| OSR1                  | 90             | PKMYT1                        | 88             | RSK4(Kin.Dom.2-C-terminal) | 94             |
| p38-alpha             | 100            | PKN1                          | 100            | S6K1                       | 90             |
| p38-beta              | 94             | PKN2                          | 86             | SBK1                       | 100            |
| p38-delta             | 95             | PKNB(M.tuberculosis)          | 96             | SGK                        | 94             |
| p38-gamma             | 100            | PLK1                          | 79             | Sgk110                     | 72             |
| PAK1                  | 92             | PLK2                          | 89             | SGK2                       | 100            |
| PAK2                  | 77             | PLK3                          | 95             | SGK3                       | 100            |
| PAK3                  | 70             | PLK4                          | 89             | SIK                        | 100            |
| PAK4                  | 98             | PRKCD                         | 89             | SIK2                       | 100            |
| PAK6                  | 100            | PRKCE                         | 100            | SLK                        | 100            |
| PAK7                  | 98             | PRKCH                         | 100            | SNARK                      | 100            |
| PCTK1                 | 97             | PRKCI                         | 100            | SNRK                       | 98             |
| PCTK2                 | 93             | PRKCQ                         | 100            | SRC                        | 100            |
| PCTK3                 | 99             | PRKD1                         | 92             | SRMS                       | 99             |
| PDGFRA                | 98             | PRKD2                         | 98             | SRPK1                      | 92             |
| PDGFRB                | 99             | PRKD3                         | 96             | SRPK2                      | 76             |
| PDPK1                 | 95             | PRKG1                         | 100            | SRPK3                      | 76             |
| PFCDPK1(P.falciparum) | 70             | PRKG2                         | 99             | STK16                      | 97             |
| PFPK5(P.falciparum)   | 84             | PRKR                          | 93             | STK33                      | 80             |
| PFTAIRE2              | 100            | PRKX                          | 100            | STK35                      | 98             |
| PFTK1                 | 92             | PRP4                          | 92             | STK36                      | 88             |
| PHKG1                 | 100            | PYK2                          | 100            | STK39                      | 100            |
| PHKG2                 | 96             | QSK                           | 93             | SYK                        | 100            |
| PIK3C2B               | 98             | RAF1                          | 76             | TAK1                       | 71             |
| PIK3C2G               | 66             | RET                           | 96             | TAOK1                      | 100            |
| PIK3CA                | 80             | RET(M918T)                    | 89             | TAOK2                      | 100            |
| PIK3CA(C420R)         | 92             | RET(V804L)                    | 91             | TAOK3                      | 91             |
| PIK3CA(E542K)         | 88             | RET(V804M)                    | 95             | TBK1                       | 100            |
| PIK3CA(E545A)         | 93             | RIOK1                         | 77             | TEC                        | 100            |
| PIK3CA(E545K)         | 82             | RIOK2                         | 99             | TESK1                      | 96             |
| PIK3CA(H1047L)        | 100            | RIOK3                         | 97             | TGFBR1                     | 86             |
| PIK3CA(H1047Y)        | 100            | RIPK1                         | 80             | TGFBR2                     | 88             |
| PIK3CA(I800L)         | 84             | RIPK2                         | 100            | TIE1                       | 100            |
| PIK3CA(M1043I)        | 63             | RIPK4                         | 97             | TIE2                       | 100            |
| PIK3CA(Q546K)         | 97             | RIPK5                         | 95             | TLK1                       | 91             |
| PIK3CB                | 93             | ROCK1                         | 100            | TLK2                       | 95             |
| PIK3CD                | 86             | ROCK2                         | 100            | TNIIK                      | 89             |
| PIK3CG                | 70             | ROS1                          | 91             | TNK1                       | 74             |
| PIK4CB                | 94             | RPS6KA4(Kin.Dom.1-N-terminal) | 100            | TNK2                       | 100            |
| PIKFYVE               | 100            | RPS6KA4(Kin.Dom.2-C-terminal) | 99             | TNNI3K                     | 100            |
| PIM1                  | 100            | RPS6KA5(Kin.Dom.1-N-terminal) | 100            | TRKA                       | 100            |
| PIM2                  | 100            | RPS6KA5(Kin.Dom.2-C-terminal) | 85             | TRKB                       | 100            |
| PIM3                  | 100            | RSK1(Kin.Dom.1-N-terminal)    | 80             | TRKC                       | 100            |

#### %Ctrl Legend

|        |        |        |         |      |
|--------|--------|--------|---------|------|
| 0≤x<.1 | .1≤x<1 | 1≤x<10 | 10≤x<35 | x≥35 |
|--------|--------|--------|---------|------|

| Target                       | S-CE-123       |
|------------------------------|----------------|
| Gene Symbol                  | %Ctrl @ 2800nM |
| TRPM6                        | 100            |
| TSSK1B                       | 73             |
| TSSK3                        | 100            |
| TTK                          | 86             |
| TXK                          | 89             |
| TYK2(JH1domain-catalytic)    | 98             |
| TYK2(JH2domain-pseudokinase) | 100            |
| TYRO3                        | 100            |
| ULK1                         | 100            |
| ULK2                         | 100            |
| ULK3                         | 100            |
| VEGFR2                       | 97             |
| VPS34                        | 100            |
| VRK2                         | 98             |
| WEE1                         | 100            |
| WEE2                         | 100            |
| WNK1                         | 68             |
| WNK2                         | 100            |
| WNK3                         | 100            |
| WNK4                         | 100            |
| YANK1                        | 88             |
| YANK2                        | 98             |
| YANK3                        | 100            |
| YES                          | 100            |
| YSK1                         | 88             |
| YSK4                         | 96             |
| ZAK                          | 88             |
| ZAP70                        | 96             |

%Ctrl Legend

|       |       |        |         |      |
|-------|-------|--------|---------|------|
| 0≤x<1 | 1≤x<1 | 1≤x<10 | 10≤x<35 | x≥35 |
|-------|-------|--------|---------|------|

## Pharmacokinetics study in rats after single intra-peritoneal administration of S-CE-123 at 10 mg/kg/body weight

### Animals

Eighteen male Sprague Dawley (Rj Han:SD) rats

Age/weight: 200-225 grams at the day of the delivery day

Breeder: Janvier Labs , Le Genest-Saint-Isle, 53940 Saint Berthevin Cedex, France.

Pre-treatment period: after their arrival, the animals were acclimated for a period of at least 5 days before the beginning of the surgery or the dosing period.

From animal arrival at Evotec France, the animals were group-housed by 2 corresponding to the same compound treatment in dedicated home cages (1291H; size 820 cm<sup>2</sup> , Tecniplast );

The animal room conditions were set as follow: temperature: 22 ± 2°C, relative humidity : 50 ± 10%, light/dark cycle : 12 h/12 h, air change rate : 12 to 15 cycles/hour of filtered, 100% fresh air. All animals

had free access to filtered tap water. All rats are fed with a maintenance chow (AO4C, Safe, 89290 Augy) during the acclimation and the study.

### **Jugular vein cannula implantation**

#### **Materials:**

- catheter C30PU-RJV1303 – polyurethane ; size : 3Fr ( $\varnothing$  0.6X1.0 mm) L : 30cm ;
- pin-port and pin-port injector;
- heparinized saline solution: 5 mL d'Héparine ChoayND (25 000UI corresponding to 5000 UI/mL) in 45 mL of saline solution NaCl 0.9% corresponding to a final concentration of 500 UI/mL
- Isoflurane anesthesia (Isoflo 100%)
- Buprenorphine (Buprecare)
- Disinfectant soap (Polyvidone iode VetedineScrub) and disfectant (10% Vetedine solution)
- Alcohol 70°
- 5-0 non absorbable suture with curved needle
- Sterile gauze pads
- Heating pads
- Sterile saline

#### **Methods:**

The main step for the implantation of cannula in jugular vein are described as follows

- Remove the hair and disinfect the incision sites (dorsal and ventral) with appropriate disinfection protocol with Vetedine ScrubND, Alcohol 70° and Vetedine ND (repeated 3 times); apply lubricant ointment on the eye.
- Administer buprenorphine (BuprecareND, multidose 0.3 mg/ml, Axience) 0.05 mg/kg by SC route just before surgery and 8 H post-surgery
- Prepare the catheter and fill it in with heparinized saline solution
- Place the rat in dorsal recumbency on the heating pad
- Make a 1 cm ventral cervical skin incision right of the midline of the neck at the level of the clavicle
- Using a hemostat, bluntly dissect the right jugular vein, separate out the salivary and lymphatic tissues to visualize and isolate a 5 mm section of the vessel. Using 5-0 non absorbable suture, place a loose tie on both cranial and caudal ends of the vessel to maximize the exposure of the vessel. Using a micro surgical scissor make an incision large enough to pass the catheter, in line with the vessel between the two ligatures and tie the cranial ligature around the vessel.

- Insert the venous catheter into the vessel towards the heart with the assistance of the micro dissecting hook and forceps and advance the catheter until all of the PU 3F segment is in the vessel. Use the ligatures at the cranial and caudal ends to secure the catheter to the vessel.
- Place the rat in sternal recumbency; make a 1 cm dorsal skin incision at the center of the nape of the neck (between the scapulae).
- Through the ventral incision, a probe with the catheter is guided under the skin to the dorsal incision; the top of the catheter is now connected to pin-port system.
- After blood flow observed in the PE, close the skin incision with 5-0 non absorbable suture and disinfect with vetedine ND.

Rats are recovered during two days before starting the study.

**Table S6** Study design

| Group                                    | Number of animals/ Group | Test Article | Dose Level (mg/kg) | Route | Dose Volume (mL/kg) | Study design | Sampling time number | Blood sampling | Brain collection                  |
|------------------------------------------|--------------------------|--------------|--------------------|-------|---------------------|--------------|----------------------|----------------|-----------------------------------|
| IP group (serial design) – 10 mg/Kg      | 3                        | (S)-CE-123   | 10                 | IP    | 5                   | Serial       | 6                    | Cannula        | Yes @ 24 hrs as terminal sampling |
| IP group (destructive design) – 10 mg/Kg | 15                       | (S)-CE-123   | 10                 | IP    | 5                   | Destructive  | 5                    | Cava vena      | Yes                               |

## Randomization

Before surgery, the rats have been randomized depending on their weights to obtain groups

of rats with homogeneous weights for surgery.

On the day of dosing, the catheterized rats have also been randomized as well as the rats for

destructive design to obtain groups of three rats with homogeneous weights for the study.

## Dose Administration

For intraperitoneal route, the dose formulation were administered by intraperitoneal injection in the rat's lower right quadrant using a stainless steel needle fitted on a plastic syringe. The volume of dose formulation administered to each animal was adjusted according to the body weight. A constant dosage volume of 5 mL/kg was used. The exact dose administered to each animal was measured by weighing the dosing system before and after administration. The dose formulations was maintained under delivery conditions (at room temperature, protected from light) throughout the dosing

procedure. The test item dose formulations was stirred for at least 5 minutes before and throughout the dosing procedure.

### **Blood collection**

#### **Serial design:**

At each scheduled sampling time, 200µL of blood was collected from the cannula on conscious rats. Blood was collected in 1.5 ml Eppendorf vial. After withdrawing the blood, the withdrawn volume was replaced with sterile saline solution (approx. 200µL). At the last sampling time of the dosing day, the cannula was flushing with an anticoagulant solution (heparinized saline solution) and was closed tightly. Blood was centrifuged at 10000g for 3 min at +4°C. Plasma samples (approximately 40 µL) was collected in a 96 well plate in triplicate and then stored at -20°C until bioanalysis.

### **Clinical observation**

All animals were observed for mortality and general condition at least twice daily (once in the morning and once in the afternoon) during the week and once daily during the weekend. The adverse event, clinical signs or death were reported in the study book.

### **Bioanalytical Methods**

- Pump : Thermo Accela
- Auto Sampler: Thermo Accela Open AS
- Column Oven : Agilent 1100 Heater
- Mass Spectrometer : Thermo TSQ Quantum Ultra
- Software : Excalibur version 2.1.0

### **Chromatography**

- Column: Hypersil Gold C18 (50x2.1mm ; 1.9µm)
- Flow : 700µl/mn
- Oven temperature: 40°C
- Mobile phase :
  - Phase A aqueous-acidic: formic acid (0.1%) / HPLC water
  - Phase B organic-acidic: formic acid (0.1%) / Acetonitrile

**Table S7** Gradient mode

| Time (min) | 0  | 0.1 | 0.5 | 1.5 | 1.6 | 2.0 |
|------------|----|-----|-----|-----|-----|-----|
| % Phase A  | 95 | 95  | 5   | 5   | 95  | 95  |
| % Phase B  | 5  | 5   | 95  | 95  | 5   | 5   |

Injection Volume: 5 µL

### **Mass spectrometry**

- Ionization mode: ESI positive mode

- Capillary Temperature: 350 °C
- Vaporizer Temperature: 350 °C

**Table S8** MS parameters.

|                              |                                                                   |
|------------------------------|-------------------------------------------------------------------|
| Skimmer offset               | (S)-CE-123: unused<br>Tolbutamide (ISTD): unused                  |
| Collision Energy Voltage     | (S)-CE-123: 11 V<br>Tolbutamide (ISTD): 30 V                      |
| Multiple Reaction Monitoring | (S)-CE-123: m/z 314.045 → 167.060<br>Tolbutamide m/z 271.4 → 91.2 |
| Retention Time               | (S)-CE-123: 0.92mn<br>Tolbutamide: 0.93mn                         |

### **Preparation of quality control and calibration samples**

Quality Control (QC) samples and Calibration Samples were prepared daily by spiking rat plasma or brain homogenates with working solutions prepared from independent weighing. The calibration curve were recalculated from calibration levels at 2.5, 5, 10, 25, 50, 100, 200, 500, 1000, 2000 and 5000 ng/mL (at least 75% of all standards used to make up the curve will back-calculate to  $\pm 20\%$  of their nominal value and at least six non-zero concentrations that back-calculate to  $\pm 20\%$  of their nominal value were used for the quantitation of the samples). The concentrations for Quality Controls were 12.5, 50, 150, 450, 1500 and 4000 ng/mL (At least 66% of all QC samples must be within  $\pm 20\%$  of their nominal value and at least 50% of QC samples at a given concentration must be within  $\pm 20\%$  of their nominal value). Regressions used were linear or quadratic regressions (plasma and brain, respectively) not forced through the origin, and weighted by  $1/x^2$  or  $1/x$  (plasma and brain, respectively) (with  $R^2 > 0.98$ ). The lower limit of quantification (LLOQ) was defined as being less or equal to 120% of the area of the first EB following the ULOQ.

### **PK analysis**

The pharmacokinetic parameters were calculated from the individual plasma concentrations using the program WinNonLin 7.0 (Phoenix 64), non-compartmental model 200.

### **Study Plan adherence and deviation**

No deviation was reported during the study

## **Results**

**Table S9** Individual plasma concentrations of (S)-CE-123 (serial design)



| Animal                         | 1               |               | 2               |               | 3               |               |
|--------------------------------|-----------------|---------------|-----------------|---------------|-----------------|---------------|
| Animal Weight (g)              | 250             |               | 258             |               | 267             |               |
| Dose Volume (mL)               | 1.00            |               | 1.03            |               | 1.07            |               |
| Actual Dose (mg/kg)            | 10              |               | 10              |               | 10              |               |
| Nominal Sampling Timepoint (h) | Actual Time (h) | Conc. (ng/mL) | Actual Time (h) | Conc. (ng/mL) | Actual Time (h) | Conc. (ng/mL) |
| 0.25                           | 0.25            | 5295          | 0.25            | 9998          | 0.25            | 11591         |
| 0.50                           | 0.50            | 3984          | 0.50            | 4836          | 0.50            | 8834          |
| 1.00                           | 1.00            | 2238          | 1.00            | 2629          | 1.00            | 4878          |
| 3.00                           | 3.00            | 260           | 3.00            | 464           | 3.00            | 1969          |
| 7.00                           | 7.00            | 3.40          | 7.00            | 2.66          | 7.00            | 78.2          |
| 24.00                          | 24.00           | BLQ           | 24.00           | BLQ           | 24.00           | BLQ           |

**Table S10** Individual plasma and brain concentrations of (S)-CE-123 (destructive design and terminal sampling time of serial design@ 24hrs)

| Time h            | Animal ID | Plasma ng/ml | Brain ng/g | Kp Br:Pl |
|-------------------|-----------|--------------|------------|----------|
| 0.25              | 7         | 8738         | 5600       | 0.64     |
|                   | 8         | 3797         | 3787       | 1.00     |
|                   | 9         | 4413         | 4956       | 1.12     |
|                   | MEAN      | 5649         | 4781       | 0.92     |
|                   | SD        | 2692         | 919        | 0.25     |
| 0.5               | 10        | 2637         | 2586       | 0.98     |
|                   | 11        | 575          | 605        | 1.05     |
|                   | 12        | 4124         | 3795       | 0.92     |
|                   | MEAN      | 2445         | 2329       | 0.98     |
|                   | SD        | 1782         | 1611       | 0.07     |
| 1                 | 13        | 1242         | 1335       | 1.08     |
|                   | 14        | 646          | 601        | 0.93     |
|                   | 15        | 1182         | 1268       | 1.07     |
|                   | MEAN      | 1023         | 1068       | 1.03     |
|                   | SD        | 328          | 406        | 0.08     |
| 3                 | 16        | 182          | 183        | 1.0      |
|                   | 17        | 145          | 124        | 0.9      |
|                   | 18        | 31.5         | 26.6       | 0.8      |
|                   | MEAN      | 120          | 111        | 0.90     |
|                   | SD        | 78.5         | 79.1       | 0.09     |
| 7                 | 19        | BLQ          | BLQ        | NC       |
|                   | 20        | BLQ          | BLQ        | NC       |
|                   | 21        | 10.7         | BLQ        | NC       |
|                   | MEAN      | BLQ          | BLQ        | NC       |
|                   | SD        | -            | -          | -        |
| 24 (brain serial) | 1         | BLQ          | BLQ        | NC       |
|                   | 2         | BLQ          | BLQ        | NC       |
|                   | 3         | BLQ          | BLQ        | NC       |
|                   | MEAN      | BLQ          | BLQ        | NC       |
|                   | SD        | -            | -          | -        |
|                   |           |              |            | 0.96     |
|                   |           |              |            | 0.06     |

**Table S11** Individual plasma pharmacokinetics parameters of S-CE-123.

| PK Parameter                              | IP 10 mg/kg |       |       |
|-------------------------------------------|-------------|-------|-------|
|                                           | 1           | 2     | 3     |
| Dose (mg/kg)                              | 10          | 10    | 10    |
| Dose (μmol/kg)                            | 32          | 32    | 32    |
| C <sub>0</sub> / C <sub>max</sub> (ng/mL) | 5295        | 9998  | 11591 |
| C <sub>0</sub> / C <sub>max</sub> (nM)    | 16838       | 31796 | 36862 |
| T <sub>max</sub> (h)                      | 0.25        | 0.25  | 0.25  |
| t <sub>1/2</sub> (h)                      | 0.64        | 0.59  | 0.98  |
| MRT (h)                                   | -           | -     | -     |
| Vdss (L/kg)                               | -           | -     | -     |
| CL / CL <sub>F</sub> (mL/min/kg)          | 31          | 22    | 10    |
| AUC <sub>inf</sub> (ng.hr/mL)             | 5406        | 7692  | 16187 |
| AUC <sub>inf</sub> (nM.hr)                | 17191       | 24463 | 51475 |
| AUC <sub>0-4</sub> (ng.hr/mL)             | 5403        | 7690  | 16076 |
| AUC <sub>0-4</sub> (nM.hr)                | 17181       | 24456 | 51123 |
| Fraction Absorbed                         | -           | -     | -     |
| C <sub>last</sub> (ng/mL)                 | 3.4         | 2.7   | 78.2  |
| Number of Points used for Lambda z        | 3           | 3     | 3     |
| AUC % Extrapolation to infinity           | 0.1         | 0.0   | 0.7   |
| T <sub>last</sub> (h)                     | 7           | 7     | 7     |
